# Supplementary material for: CaWRKY40b in Pepper Acts as a Negative Regulator in Response to Ralstonia solanacearum by Directly Modulating Defense Genes Including CaWRKY40
Source: Int J Mol Sci. 2018 May 8;19(5):1403. doi: 10.3390/ijms19051403 (PMC5983674; doi:10.3390/ijms19051403)
Supplement: Supplementary file 1 [file ijms-19-01403-s001.zip › Table S1.xls]

# This file is generated by MACS version 2.1.0.20150420
# Command line: callpeak -t ../mapping/CaWRKY40b.uni.dedup.bam -c ../mapping/Input.uni.dedup.bam -n CaWRKY40b -g 2753501687 -f AUTO -q 0.05 --nomodel --extsize 186 --call-summits --outdir .
# ARGUMENTS LIST:
# name = CaWRKY40b
# format = AUTO
# ChIP-seq file = ['../mapping/CaWRKY40b.uni.dedup.bam']
# control file = ['../mapping/Input.uni.dedup.bam']
# effective genome size = 2.75e+09
# band width = 300
# model fold = [5, 50]
# qvalue cutoff = 5.00e-02
# Larger dataset will be scaled towards smaller dataset.
# Range for calculating regional lambda is: 1000 bps and 10000 bps
# Broad region calling is off
# Searching for subpeak summits is on
# tag size is determined as 50 bps
# total tags in treatment: 1042563
# tags after filtering in treatment: 1032483
# maximum duplicate tags at the same position in treatment = 1
# Redundant rate in treatment: 0.01
# total tags in control: 22999030
# tags after filtering in control: 22974827
# maximum duplicate tags at the same position in control = 1
# Redundant rate in control: 0.00
# d = 186
chr	start	end	length	abs_summit	pileup	#NAME?	fold_enrichment	#NAME?	name
Pepper.v.1.55.chr01	86056	86346	291	86229	12	10.75835	6.84645	6.32067	CaWRKY40b_peak_1
Pepper.v.1.55.chr01	997198	997383	186	997286	4	6.02369	4.28384	1.99313	CaWRKY40b_peak_2
Pepper.v.1.55.chr01	1665207	1665405	199	1665303	9	6.65535	4.81104	2.54507	CaWRKY40b_peak_3
Pepper.v.1.55.chr01	3999071	3999372	302	3999211	8	15.49198	8.3379	10.8971	CaWRKY40b_peak_4
Pepper.v.1.55.chr01	4011381	4011606	226	4011487	6	11.04774	6.4204	6.60279	CaWRKY40b_peak_5
Pepper.v.1.55.chr01	4058859	4059093	235	4058981	7	10.63732	6.78105	6.20325	CaWRKY40b_peak_6
Pepper.v.1.55.chr01	4166375	4166600	226	4166488	5	6.8312	4.89916	2.70469	CaWRKY40b_peak_7
Pepper.v.1.55.chr01	7997109	7997364	256	7997208	6	11.06094	6.42273	6.60712	CaWRKY40b_peak_8
Pepper.v.1.55.chr01	9485664	9485978	315	9485842	9	14.84497	8.69219	10.26689	CaWRKY40b_peak_9
Pepper.v.1.55.chr01	12961184	12961434	251	12961323	4	7.88685	4.67401	3.59576	CaWRKY40b_peak_10
Pepper.v.1.55.chr01	17382485	17382670	186	17382562	5	7.39599	5.08578	3.18729	CaWRKY40b_peak_11
Pepper.v.1.55.chr01	17514442	17514628	187	17514526	4	7.88685	4.67401	3.59576	CaWRKY40b_peak_12
Pepper.v.1.55.chr01	19466108	19466293	186	19466222	6	7.78923	5.51338	3.54984	CaWRKY40b_peak_13
Pepper.v.1.55.chr01	21717608	21717793	186	21717696	3	4.92152	3.52814	1.39265	CaWRKY40b_peak_14
Pepper.v.1.55.chr01	29104377	29104690	314	29104564	5	7.39599	5.08578	3.18729	CaWRKY40b_peak_15
Pepper.v.1.55.chr01	33846121	33846461	341	33846347	8	15.92346	8.40297	11.31372	CaWRKY40b_peak_16
Pepper.v.1.55.chr01	33846561	33847017	457	33846832	42	84.90575	36.44812	79.11129	CaWRKY40b_peak_17
Pepper.v.1.55.chr01	36112580	36112765	186	36112645	3	4.90794	3.52479	1.38904	CaWRKY40b_peak_18
Pepper.v.1.55.chr01	40860741	40860969	229	40860850	3	5.4097	3.63535	1.76837	CaWRKY40b_peak_19
Pepper.v.1.55.chr01	41446555	41446765	211	41446659	10	19.14666	10.09286	14.45437	CaWRKY40b_peak_20
Pepper.v.1.55.chr01	41872506	41872767	262	41872624	7	12.75012	7.29287	8.23977	CaWRKY40b_peak_21
Pepper.v.1.55.chr01	42346434	42346803	370	42346613	21	46.52251	20.56566	41.29241	CaWRKY40b_peak_22
Pepper.v.1.55.chr01	42552418	42552603	186	42552507	3	4.90794	3.52479	1.38904	CaWRKY40b_peak_23
Pepper.v.1.55.chr01	42917116	42917484	369	42917274	17	31.52627	15.86156	26.57332	CaWRKY40b_peak_24
Pepper.v.1.55.chr01	47053252	47053752	501	47053472	34	57.72654	26.62451	52.32253	CaWRKY40b_peak_25
Pepper.v.1.55.chr01	48220394	48220625	232	48220540	4	7.10881	4.54419	2.95971	CaWRKY40b_peak_26
Pepper.v.1.55.chr01	52798454	52798639	186	52798541	4	7.29474	4.57898	3.12721	CaWRKY40b_peak_27
Pepper.v.1.55.chr01	54402882	54403263	382	54403040	17	26.16317	14.17726	21.31116	CaWRKY40b_peak_28
Pepper.v.1.55.chr01	61400224	61400409	186	61400303	6	5.34913	4.2967	1.74745	CaWRKY40b_peak_29
Pepper.v.1.55.chr01	63746034	63746361	328	63746214	5	6.8312	4.89916	2.70469	CaWRKY40b_peak_30
Pepper.v.1.55.chr01	68038806	68038991	186	68038889	5	9.74422	5.59761	5.36353	CaWRKY40b_peak_31
Pepper.v.1.55.chr01	76452198	76452383	186	76452315	5	8.88669	5.45303	4.55176	CaWRKY40b_peak_32
Pepper.v.1.55.chr01	76789938	76790123	186	76790111	5	9.68494	5.5889	5.3071	CaWRKY40b_peak_33
Pepper.v.1.55.chr01	78571484	78571669	186	78571561	4	7.03882	4.53043	2.89698	CaWRKY40b_peak_34
Pepper.v.1.55.chr01	92524982	92526205	1224	92525600	24	39.53368	19.69064	34.4366	CaWRKY40b_peak_35a
Pepper.v.1.55.chr01	92524982	92526205	1224	92525958	39	77.80019	33.90523	72.10162	CaWRKY40b_peak_35b
Pepper.v.1.55.chr01	107685135	107685320	186	107685302	5	9.57035	5.57154	5.19662	CaWRKY40b_peak_36
Pepper.v.1.55.chr01	115037905	115038123	219	115038039	5	8.12895	5.28719	3.81926	CaWRKY40b_peak_37
Pepper.v.1.55.chr01	118064747	118064932	186	118064807	4	6.63332	4.44294	2.52361	CaWRKY40b_peak_38
Pepper.v.1.55.chr01	127506895	127507083	189	127506998	7	9.2632	6.30101	4.8988	CaWRKY40b_peak_39
Pepper.v.1.55.chr01	128011467	128011820	354	128011726	7	13.01092	7.34026	8.48801	CaWRKY40b_peak_40
Pepper.v.1.55.chr01	128184691	128184876	186	128184832	6	11.5963	6.51024	7.13016	CaWRKY40b_peak_41
Pepper.v.1.55.chr01	128361909	128362218	310	128362082	18	33.67542	16.74275	28.6827	CaWRKY40b_peak_42
Pepper.v.1.55.chr01	128362599	128362807	209	128362708	4	7.88685	4.67401	3.59576	CaWRKY40b_peak_43
Pepper.v.1.55.chr01	128879386	128879689	304	128879516	14	23.3693	12.71446	18.57398	CaWRKY40b_peak_44
Pepper.v.1.55.chr01	130872670	130872855	186	130872762	5	9.82222	5.60882	5.41776	CaWRKY40b_peak_45
Pepper.v.1.55.chr01	144103547	144103750	204	144103639	7	13.88435	7.47842	9.32851	CaWRKY40b_peak_46
Pepper.v.1.55.chr01	146888943	146889129	187	146889054	6	7.78923	5.51338	3.54984	CaWRKY40b_peak_47
Pepper.v.1.55.chr01	150783725	150784064	340	150783870	13	25.62558	12.84546	20.78202	CaWRKY40b_peak_48
Pepper.v.1.55.chr01	151534010	151534195	186	151534097	4	7.88685	4.67401	3.59576	CaWRKY40b_peak_49
Pepper.v.1.55.chr01	164270318	164270644	327	164270521	5	9.35556	5.53716	4.98852	CaWRKY40b_peak_50
Pepper.v.1.55.chr01	170832082	170832431	350	170832268	37	76.98014	33.27206	71.29423	CaWRKY40b_peak_51
Pepper.v.1.55.chr01	174925159	174925448	290	174925280	8	14.68501	8.19823	10.11299	CaWRKY40b_peak_52
Pepper.v.1.55.chr01	178610450	178610822	373	178610656	19	39.35009	18.35065	34.25993	CaWRKY40b_peak_53
Pepper.v.1.55.chr01	178611263	178611453	191	178611413	7	13.01092	7.34026	8.48801	CaWRKY40b_peak_54
Pepper.v.1.55.chr01	178756303	178756488	186	178756380	3	6.03037	3.73921	1.99313	CaWRKY40b_peak_55
Pepper.v.1.55.chr01	178810279	178810464	186	178810357	5	9.51493	5.56291	5.14411	CaWRKY40b_peak_56
Pepper.v.1.55.chr01	179968207	179968539	333	179968418	12	19.42904	10.98072	14.72814	CaWRKY40b_peak_57
Pepper.v.1.55.chr01	181643008	181643363	356	181643147	7	10.63732	6.78105	6.20325	CaWRKY40b_peak_58
Pepper.v.1.55.chr01	193748729	193748914	186	193748814	5	8.36626	5.34343	4.04715	CaWRKY40b_peak_59
Pepper.v.1.55.chr01	199196298	199196483	186	199196436	5	9.82222	5.60882	5.41776	CaWRKY40b_peak_60
Pepper.v.1.55.chr01	202867766	202868229	464	202867947	33	60.61053	27.76193	55.16033	CaWRKY40b_peak_61
Pepper.v.1.55.chr01	204049980	204050203	224	204050088	5	9.1688	5.5052	4.80958	CaWRKY40b_peak_62
Pepper.v.1.55.chr01	207886253	207886701	449	207886388	14	27.52662	13.70546	22.64741	CaWRKY40b_peak_63
Pepper.v.1.55.chr01	207886894	207887086	193	207886991	4	7.25622	4.57198	3.09842	CaWRKY40b_peak_64
Pepper.v.1.55.chr01	207887325	207888427	1103	207887577	14	25.27699	13.23054	20.44361	CaWRKY40b_peak_65
Pepper.v.1.55.chr01	207888653	207889040	388	207888817	12	16.45057	9.8891	11.82275	CaWRKY40b_peak_66
Pepper.v.1.55.chr01	207889161	207889677	517	207889448	19	33.36665	16.95261	28.38305	CaWRKY40b_peak_67
Pepper.v.1.55.chr01	207889767	207890315	549	207890054	9	12.35829	7.87626	7.85452	CaWRKY40b_peak_68
Pepper.v.1.55.chr01	207890734	207891546	813	207891152	19	33.36665	16.95261	28.38305	CaWRKY40b_peak_69
Pepper.v.1.55.chr01	207892975	207893345	371	207893107	7	12.93271	7.32636	8.41857	CaWRKY40b_peak_70
Pepper.v.1.55.chr01	207893546	207894350	805	207893784	13	25.48816	12.82114	20.64841	CaWRKY40b_peak_71
Pepper.v.1.55.chr01	219693659	219694056	398	219693857	26	40.18305	19.85998	35.07399	CaWRKY40b_peak_72
Pepper.v.1.55.chr01	223300362	223300567	206	223300527	10	13.96981	8.66388	9.41142	CaWRKY40b_peak_73
Pepper.v.1.55.chr01	227904026	227904381	356	227904175	8	15.01193	8.25779	10.42578	CaWRKY40b_peak_74
Pepper.v.1.55.chr01	248950918	248951103	186	248951004	4	6.47914	4.40599	2.38256	CaWRKY40b_peak_75
Pepper.v.1.55.chr01	252409992	252410346	355	252410190	28	26.97415	11.89464	22.11551	CaWRKY40b_peak_76
Pepper.v.1.55.chr01	254612405	254612685	281	254612545	5	9.1688	5.5052	4.80958	CaWRKY40b_peak_77
Pepper.v.1.55.chr01	255451740	255451925	186	255451843	11	10.38899	6.80281	5.96399	CaWRKY40b_peak_78
Pepper.v.1.55.chr01	255561679	255561864	186	255561752	5	9.1688	5.5052	4.80958	CaWRKY40b_peak_79
Pepper.v.1.55.chr01	257242999	257243347	349	257243181	26	51.59013	23.79234	46.28146	CaWRKY40b_peak_80
Pepper.v.1.55.chr01	257371047	257371290	244	257371167	11	13.0287	8.2793	8.50468	CaWRKY40b_peak_81
Pepper.v.1.55.chr01	262928736	262928921	186	262928834	4	7.10881	4.54419	2.95971	CaWRKY40b_peak_82
Pepper.v.1.55.chr01	265913253	265913646	394	265913451	8	12.33775	7.62868	7.83623	CaWRKY40b_peak_83
Pepper.v.1.55.chr01	267192732	267193013	282	267192894	4	6.47914	4.40599	2.38256	CaWRKY40b_peak_84
Pepper.v.1.55.chr01	268807518	268807703	186	268807679	5	9.82222	5.60882	5.41776	CaWRKY40b_peak_85
Pepper.v.1.55.chr01	271640349	271640534	186	271640469	3	4.91098	3.52554	1.39192	CaWRKY40b_peak_86
Pepper.v.1.55.chr01	272403044	272403229	186	272403127	4	6.63332	4.44294	2.52361	CaWRKY40b_peak_87
Pepper.v.1.55.chr01	272492483	272492836	354	272492737	4	6.39265	4.38432	2.33189	CaWRKY40b_peak_88
Pepper.v.1.55.chr02	3624765	3624952	188	3624897	5	7.39599	5.08578	3.18729	CaWRKY40b_peak_89
Pepper.v.1.55.chr02	3667950	3668135	186	3668038	7	8.74492	6.0856	4.41377	CaWRKY40b_peak_90
Pepper.v.1.55.chr02	3794497	3794682	186	3794589	5	9.82222	5.60882	5.41776	CaWRKY40b_peak_91
Pepper.v.1.55.chr02	5644127	5644356	230	5644242	6	11.82435	6.54362	7.33121	CaWRKY40b_peak_92
Pepper.v.1.55.chr02	12762325	12762543	219	12762443	6	11.27917	6.46002	6.82185	CaWRKY40b_peak_93
Pepper.v.1.55.chr02	13435013	13435238	226	13435117	9	17.05863	9.17533	12.41623	CaWRKY40b_peak_94
Pepper.v.1.55.chr02	24424857	24425044	188	24424948	6	11.82435	6.54362	7.33121	CaWRKY40b_peak_95
Pepper.v.1.55.chr02	32552586	32552885	300	32552714	5	8.12895	5.28719	3.81926	CaWRKY40b_peak_96
Pepper.v.1.55.chr02	33774137	33774483	347	33774280	11	15.61897	9.45151	11.02063	CaWRKY40b_peak_97
Pepper.v.1.55.chr02	43053137	43053322	186	43053219	5	7.39599	5.08578	3.18729	CaWRKY40b_peak_98
Pepper.v.1.55.chr02	43106998	43107342	345	43107170	8	15.01193	8.25779	10.42578	CaWRKY40b_peak_99
Pepper.v.1.55.chr02	50601113	50601399	287	50601258	7	12.93271	7.32636	8.41857	CaWRKY40b_peak_100
Pepper.v.1.55.chr02	50730663	50730848	186	50730754	5	9.11031	5.49477	4.76354	CaWRKY40b_peak_101
Pepper.v.1.55.chr02	51696707	51696894	188	51696875	7	11.61951	7.04958	7.14661	CaWRKY40b_peak_102
Pepper.v.1.55.chr02	52946883	52947224	342	52947103	5	8.12895	5.28719	3.81926	CaWRKY40b_peak_103
Pepper.v.1.55.chr02	59513061	59513246	186	59513156	4	7.34337	4.58766	3.14713	CaWRKY40b_peak_104
Pepper.v.1.55.chr02	60665114	60665438	325	60665249	4	7.74841	4.65379	3.51377	CaWRKY40b_peak_105
Pepper.v.1.55.chr02	60797021	60797549	529	60797266	33	57.93732	26.77928	52.52829	CaWRKY40b_peak_106
Pepper.v.1.55.chr02	64991300	64991632	333	64991419	5	8.12895	5.28719	3.81926	CaWRKY40b_peak_107
Pepper.v.1.55.chr02	66058226	66058651	426	66058413	37	84.51746	34.86624	78.72779	CaWRKY40b_peak_108
Pepper.v.1.55.chr02	68622599	68622937	339	68622721	5	5.98773	4.5642	1.99313	CaWRKY40b_peak_109
Pepper.v.1.55.chr02	68633210	68633424	215	68633306	4	6.63332	4.44294	2.52361	CaWRKY40b_peak_110
Pepper.v.1.55.chr02	68699676	68699865	190	68699848	6	9.84535	6.16838	5.43234	CaWRKY40b_peak_111
Pepper.v.1.55.chr02	68752213	68752549	337	68752406	11	16.55115	9.79833	11.91978	CaWRKY40b_peak_112
Pepper.v.1.55.chr02	68757004	68757190	187	68757126	7	10.63732	6.78105	6.20325	CaWRKY40b_peak_113
Pepper.v.1.55.chr02	68773117	68773338	222	68773232	8	12.42905	7.65609	7.9241	CaWRKY40b_peak_114
Pepper.v.1.55.chr02	68880918	68881104	187	68881006	5	7.99461	5.25348	3.70011	CaWRKY40b_peak_115
Pepper.v.1.55.chr02	68979400	68979585	186	68979491	4	6.49619	4.41018	2.39454	CaWRKY40b_peak_116
Pepper.v.1.55.chr02	69059663	69059985	323	69059808	9	14.08378	8.47631	9.51801	CaWRKY40b_peak_117
Pepper.v.1.55.chr02	69200454	69200639	186	69200501	4	6.47914	4.40599	2.38256	CaWRKY40b_peak_118
Pepper.v.1.55.chr02	69270403	69270729	327	69270537	4	6.63332	4.44294	2.52361	CaWRKY40b_peak_119
Pepper.v.1.55.chr02	71372420	71372605	186	71372512	4	6.47914	4.40599	2.38256	CaWRKY40b_peak_120
Pepper.v.1.55.chr02	75481823	75482158	336	75481969	15	30.00473	14.66395	25.07813	CaWRKY40b_peak_121
Pepper.v.1.55.chr02	76672738	76672923	186	76672822	3	5.4097	3.63535	1.76837	CaWRKY40b_peak_122
Pepper.v.1.55.chr02	80960942	80961127	186	80961003	4	7.34337	4.58766	3.14713	CaWRKY40b_peak_123
Pepper.v.1.55.chr02	95461917	95462119	203	95462033	5	9.82222	5.60882	5.41776	CaWRKY40b_peak_124
Pepper.v.1.55.chr02	96780583	96780769	187	96780665	5	7.39599	5.08578	3.18729	CaWRKY40b_peak_125
Pepper.v.1.55.chr02	101285058	101285677	620	101285183	16	14.43442	8.17876	9.86531	CaWRKY40b_peak_126a
Pepper.v.1.55.chr02	101285058	101285677	620	101285484	31	25.6438	10.13586	20.80011	CaWRKY40b_peak_126b
Pepper.v.1.55.chr02	101287104	101288761	1658	101287963	121	106.14824	16.135	100.14277	CaWRKY40b_peak_127a
Pepper.v.1.55.chr02	101287104	101288761	1658	101288483	150	148.39961	21.09898	142.03564	CaWRKY40b_peak_127b
Pepper.v.1.55.chr02	101582654	101582888	235	101582818	5	9.82222	5.60882	5.41776	CaWRKY40b_peak_128
Pepper.v.1.55.chr02	101583436	101583621	186	101583507	4	7.88685	4.67401	3.59576	CaWRKY40b_peak_129
Pepper.v.1.55.chr02	105059468	105059809	342	105059640	6	11.82435	6.54362	7.33121	CaWRKY40b_peak_130
Pepper.v.1.55.chr02	105884757	105885059	303	105884881	15	31.85295	14.95684	26.89034	CaWRKY40b_peak_131
Pepper.v.1.55.chr02	108843276	108843462	187	108843358	4	6.47914	4.40599	2.38256	CaWRKY40b_peak_132
Pepper.v.1.55.chr02	108869121	108869367	247	108869228	7	13.88435	7.47842	9.32851	CaWRKY40b_peak_133
Pepper.v.1.55.chr02	109290294	109290628	335	109290393	5	9.82222	5.60882	5.41776	CaWRKY40b_peak_134
Pepper.v.1.55.chr02	120426369	120426582	214	120426470	8	15.01193	8.25779	10.42578	CaWRKY40b_peak_135
Pepper.v.1.55.chr02	128151372	128151729	358	128151553	15	22.53827	12.60201	17.76812	CaWRKY40b_peak_136
Pepper.v.1.55.chr02	132790815	132791043	229	132790933	18	39.08717	17.76125	34.00223	CaWRKY40b_peak_137
Pepper.v.1.55.chr02	133919865	133920053	189	133920007	23	10.90825	4.75758	6.46699	CaWRKY40b_peak_138
Pepper.v.1.55.chr02	134282746	134283154	409	134282916	8	13.44466	7.93078	8.9078	CaWRKY40b_peak_139
Pepper.v.1.55.chr02	136342727	136343712	986	136342970	34	57.72654	26.62451	52.32253	CaWRKY40b_peak_140a
Pepper.v.1.55.chr02	136342727	136343712	986	136343340	35	69.60693	30.84368	64.02625	CaWRKY40b_peak_140b
Pepper.v.1.55.chr02	136942043	136942430	388	136942233	20	44.02354	19.63085	38.8363	CaWRKY40b_peak_141
Pepper.v.1.55.chr02	136945302	136945619	318	136945431	4	7.88685	4.67401	3.59576	CaWRKY40b_peak_142
Pepper.v.1.55.chr02	140239896	140240081	186	140239953	3	4.90794	3.52479	1.38904	CaWRKY40b_peak_143
Pepper.v.1.55.chr02	140434698	140434883	186	140434793	4	5.87064	4.23815	1.99313	CaWRKY40b_peak_144
Pepper.v.1.55.chr02	140964681	140964866	186	140964770	5	9.82222	5.60882	5.41776	CaWRKY40b_peak_145
Pepper.v.1.55.chr02	142388502	142388866	365	142388730	15	12.47165	7.22879	7.96634	CaWRKY40b_peak_146
Pepper.v.1.55.chr02	143792693	143793034	342	143792809	4	6.36756	4.3779	2.31088	CaWRKY40b_peak_147
Pepper.v.1.55.chr02	144745156	144745439	284	144745325	7	11.61951	7.04958	7.14661	CaWRKY40b_peak_148
Pepper.v.1.55.chr02	158216281	158217034	754	158216415	11	14.83359	9.1284	10.25655	CaWRKY40b_peak_149a
Pepper.v.1.55.chr02	158216281	158217034	754	158216889	15	21.48548	12.1712	16.73194	CaWRKY40b_peak_149b
Pepper.v.1.55.chr02	158509551	158509799	249	158509660	5	7.4564	5.10406	3.24414	CaWRKY40b_peak_150
Pepper.v.1.55.chr02	158918218	158918403	186	158918304	3	5.31324	3.61612	1.71403	CaWRKY40b_peak_151
Pepper.v.1.55.chr02	159425149	159425509	361	159425330	21	37.52224	18.64788	32.4631	CaWRKY40b_peak_152
Pepper.v.1.55.chr02	163735064	163735286	223	163735163	6	11.82435	6.54362	7.33121	CaWRKY40b_peak_153
Pepper.v.1.55.chr02	164193188	164193744	557	164193447	47	85.33675	36.51361	79.53196	CaWRKY40b_peak_154
Pepper.v.1.55.chr02	164592876	164593088	213	164592965	4	7.34337	4.58766	3.14713	CaWRKY40b_peak_155
Pepper.v.1.55.chr02	165279941	165280270	330	165280081	10	20.15181	10.25429	15.43571	CaWRKY40b_peak_156
Pepper.v.1.55.chr02	165284898	165285218	321	165285079	12	21.16186	11.45557	16.42154	CaWRKY40b_peak_157
Pepper.v.1.55.chr02	165776043	165776228	186	165776134	3	5.55796	3.66318	1.82835	CaWRKY40b_peak_158
Pepper.v.1.55.chr02	166129549	166129734	186	166129672	5	8.12895	5.28719	3.81926	CaWRKY40b_peak_159
Pepper.v.1.55.chr02	167887565	167887750	186	167887654	5	7.39599	5.08578	3.18729	CaWRKY40b_peak_160
Pepper.v.1.55.chr03	704097	704282	186	704199	5	8.49122	5.37142	4.16882	CaWRKY40b_peak_161
Pepper.v.1.55.chr03	2100561	2100746	186	2100652	5	9.1688	5.5052	4.80958	CaWRKY40b_peak_162
Pepper.v.1.55.chr03	5731913	5732237	325	5732085	8	13.44466	7.93078	8.9078	CaWRKY40b_peak_163
Pepper.v.1.55.chr03	7817154	7817344	191	7817326	6	8.32648	5.71569	4.00763	CaWRKY40b_peak_164
Pepper.v.1.55.chr03	8490239	8490427	189	8490330	6	10.73125	6.36187	6.2938	CaWRKY40b_peak_165
Pepper.v.1.55.chr03	10572200	10572483	284	10572356	5	8.12895	5.28719	3.81926	CaWRKY40b_peak_166
Pepper.v.1.55.chr03	16654432	16654617	186	16654522	6	10.73125	6.36187	6.2938	CaWRKY40b_peak_167
Pepper.v.1.55.chr03	16663886	16664113	228	16664016	5	9.27947	5.52438	4.91458	CaWRKY40b_peak_168
Pepper.v.1.55.chr03	17960922	17961117	196	17961017	7	10.63732	6.78105	6.20325	CaWRKY40b_peak_169
Pepper.v.1.55.chr03	18830938	18831221	284	18831077	8	10.20298	6.8463	5.7802	CaWRKY40b_peak_170
Pepper.v.1.55.chr03	18834380	18834708	329	18834517	17	26.16317	14.17726	21.31116	CaWRKY40b_peak_171
Pepper.v.1.55.chr03	19068991	19069176	186	19069085	5	9.82222	5.60882	5.41776	CaWRKY40b_peak_172
Pepper.v.1.55.chr03	20504943	20505497	555	20505209	35	51.45314	23.3876	46.15084	CaWRKY40b_peak_173
Pepper.v.1.55.chr03	20537099	20537689	591	20537255	9	17.05863	9.17533	12.41623	CaWRKY40b_peak_174a
Pepper.v.1.55.chr03	20537099	20537689	591	20537532	21	44.10757	20.18572	38.91601	CaWRKY40b_peak_174b
Pepper.v.1.55.chr03	31227829	31228201	373	31228007	9	15.31545	8.81198	10.72333	CaWRKY40b_peak_175
Pepper.v.1.55.chr03	31750406	31750749	344	31750518	6	11.04774	6.4204	6.60279	CaWRKY40b_peak_176
Pepper.v.1.55.chr03	32205102	32205546	445	32205309	29	63.85161	27.52598	58.35735	CaWRKY40b_peak_177
Pepper.v.1.55.chr03	52549872	52550194	323	52550058	10	19.14666	10.09286	14.45437	CaWRKY40b_peak_178
Pepper.v.1.55.chr03	57018794	57018979	186	57018877	5	9.82222	5.60882	5.41776	CaWRKY40b_peak_179
Pepper.v.1.55.chr03	70295119	70295494	376	70295243	10	13.25125	8.3677	8.72115	CaWRKY40b_peak_180
Pepper.v.1.55.chr03	77741141	77741482	342	77741321	11	19.17734	10.57437	14.4791	CaWRKY40b_peak_181
Pepper.v.1.55.chr03	78327377	78327728	352	78327605	6	7.78923	5.51338	3.54984	CaWRKY40b_peak_182
Pepper.v.1.55.chr03	88893140	88893379	240	88893240	4	7.34337	4.58766	3.14713	CaWRKY40b_peak_183
Pepper.v.1.55.chr03	95584243	95584543	301	95584396	6	11.06094	6.42273	6.60712	CaWRKY40b_peak_184
Pepper.v.1.55.chr03	99714545	99714884	340	99714718	9	13.13239	8.16527	8.60502	CaWRKY40b_peak_185
Pepper.v.1.55.chr03	104505685	104505870	186	104505798	5	8.68122	5.41192	4.35319	CaWRKY40b_peak_186
Pepper.v.1.55.chr03	114302836	114303021	186	114302931	3	5.20943	3.59439	1.63845	CaWRKY40b_peak_187
Pepper.v.1.55.chr03	119225541	119225730	190	119225627	5	8.68122	5.41192	4.35319	CaWRKY40b_peak_188
Pepper.v.1.55.chr03	119835788	119836111	324	119835934	8	8.86138	6.20948	4.52874	CaWRKY40b_peak_189
Pepper.v.1.55.chr03	125729698	125729893	196	125729785	5	5.10815	4.13965	1.55892	CaWRKY40b_peak_190
Pepper.v.1.55.chr03	127756164	127756500	337	127756328	8	10.78799	7.08863	6.34821	CaWRKY40b_peak_191
Pepper.v.1.55.chr03	134661565	134661750	186	134661651	5	9.27947	5.52438	4.91458	CaWRKY40b_peak_192
Pepper.v.1.55.chr03	138616800	138616985	186	138616920	5	6.8312	4.89916	2.70469	CaWRKY40b_peak_193
Pepper.v.1.55.chr03	156589585	156589864	280	156589731	10	19.14666	10.09286	14.45437	CaWRKY40b_peak_194
Pepper.v.1.55.chr03	161308471	161308656	186	161308551	5	9.1688	5.5052	4.80958	CaWRKY40b_peak_195
Pepper.v.1.55.chr03	161697760	161697975	216	161697849	3	4.90794	3.52479	1.38904	CaWRKY40b_peak_196
Pepper.v.1.55.chr03	170225384	170225615	232	170225522	6	10.73125	6.36187	6.2938	CaWRKY40b_peak_197
Pepper.v.1.55.chr03	183010435	183010797	363	183010593	23	39.44796	19.59665	34.35291	CaWRKY40b_peak_198
Pepper.v.1.55.chr03	183047156	183047341	186	183047243	4	7.88685	4.67401	3.59576	CaWRKY40b_peak_199
Pepper.v.1.55.chr03	183440600	183440794	195	183440689	6	11.82435	6.54362	7.33121	CaWRKY40b_peak_200
Pepper.v.1.55.chr03	193155324	193155509	186	193155389	3	5.72064	3.69144	1.91412	CaWRKY40b_peak_201
Pepper.v.1.55.chr03	193758251	193758547	297	193758430	6	9.84535	6.16838	5.43234	CaWRKY40b_peak_202
Pepper.v.1.55.chr03	193789788	193789973	186	193789930	4	6.47914	4.40599	2.38256	CaWRKY40b_peak_203
Pepper.v.1.55.chr03	194089846	194090177	332	194090011	24	20.92924	9.71669	16.19621	CaWRKY40b_peak_204
Pepper.v.1.55.chr03	199995733	199995918	186	199995741	4	6.47914	4.40599	2.38256	CaWRKY40b_peak_205
Pepper.v.1.55.chr03	200007001	200007476	476	200007250	22	46.51571	21.10325	41.28934	CaWRKY40b_peak_206
Pepper.v.1.55.chr03	201145416	201145744	329	201145539	11	13.0287	8.2793	8.50468	CaWRKY40b_peak_207
Pepper.v.1.55.chr03	203195503	203195690	188	203195595	7	13.88435	7.47842	9.32851	CaWRKY40b_peak_208
Pepper.v.1.55.chr03	205780163	205780363	201	205780302	5	9.82222	5.60882	5.41776	CaWRKY40b_peak_209
Pepper.v.1.55.chr03	207002298	207002483	186	207002458	3	5.70364	3.68859	1.91408	CaWRKY40b_peak_210
Pepper.v.1.55.chr03	215846207	215846394	188	215846377	7	13.01092	7.34026	8.48801	CaWRKY40b_peak_211
Pepper.v.1.55.chr03	216529774	216529961	188	216529858	4	6.93802	4.50993	2.79969	CaWRKY40b_peak_212
Pepper.v.1.55.chr03	217281524	217281798	275	217281665	7	13.88435	7.47842	9.32851	CaWRKY40b_peak_213
Pepper.v.1.55.chr03	217282036	217282408	373	217282275	6	7.78923	5.51338	3.54984	CaWRKY40b_peak_214
Pepper.v.1.55.chr03	221835083	221835268	186	221835234	5	9.11031	5.49477	4.76354	CaWRKY40b_peak_215
Pepper.v.1.55.chr03	222448622	222448807	186	222448687	3	4.90052	3.52295	1.38904	CaWRKY40b_peak_216
Pepper.v.1.55.chr03	227719345	227719684	340	227719493	10	9.75298	6.57071	5.37201	CaWRKY40b_peak_217
Pepper.v.1.55.chr03	227860638	227860823	186	227860734	4	6.93802	4.50993	2.79969	CaWRKY40b_peak_218
Pepper.v.1.55.chr03	228541572	228541879	308	228541728	9	14.08378	8.47631	9.51801	CaWRKY40b_peak_219
Pepper.v.1.55.chr03	229670330	229670544	215	229670432	4	6.78012	4.47618	2.6597	CaWRKY40b_peak_220
Pepper.v.1.55.chr03	231733566	231733751	186	231733678	5	9.35556	5.53716	4.98852	CaWRKY40b_peak_221
Pepper.v.1.55.chr03	234316201	234316386	186	234316328	4	7.88685	4.67401	3.59576	CaWRKY40b_peak_222
Pepper.v.1.55.chr03	235181087	235181272	186	235181178	5	9.82222	5.60882	5.41776	CaWRKY40b_peak_223
Pepper.v.1.55.chr03	237252909	237253094	186	237252994	4	6.49619	4.41018	2.39454	CaWRKY40b_peak_224
Pepper.v.1.55.chr03	237647702	237648194	493	237647914	19	39.35009	18.35065	34.25993	CaWRKY40b_peak_225
Pepper.v.1.55.chr03	239734763	239734948	186	239734852	4	7.63123	4.63576	3.40593	CaWRKY40b_peak_226
Pepper.v.1.55.chr03	241298053	241298369	317	241298243	14	23.3693	12.71446	18.57398	CaWRKY40b_peak_227
Pepper.v.1.55.chr03	241302703	241303136	434	241302929	36	61.85579	28.14591	56.38812	CaWRKY40b_peak_228
Pepper.v.1.55.chr03	242437805	242438067	263	242437931	13	23.17851	12.33677	18.39326	CaWRKY40b_peak_229
Pepper.v.1.55.chr03	247017523	247017708	186	247017603	5	9.1688	5.5052	4.80958	CaWRKY40b_peak_230
Pepper.v.1.55.chr03	247709246	247709447	202	247709263	4	7.88685	4.67401	3.59576	CaWRKY40b_peak_231
Pepper.v.1.55.chr03	249653737	249655852	2116	249654128	125	267.50922	92.6799	260.21234	CaWRKY40b_peak_232a
Pepper.v.1.55.chr03	249653737	249655852	2116	249655045	76	199.71242	71.61264	192.94371	CaWRKY40b_peak_232b
Pepper.v.1.55.chr03	249653737	249655852	2116	249655514	25	53.84803	23.85585	48.50252	CaWRKY40b_peak_232c
Pepper.v.1.55.chr03	249653737	249655852	2116	249655678	24	54.13201	23.37006	48.77456	CaWRKY40b_peak_232d
Pepper.v.1.55.chr03	250240051	250240236	186	250240138	4	7.88685	4.67401	3.59576	CaWRKY40b_peak_233
Pepper.v.1.55.chr03	252606878	252607063	186	252607027	5	9.1688	5.5052	4.80958	CaWRKY40b_peak_234
Pepper.v.1.55.chr03	253044299	253044736	438	253044534	34	70.52985	30.84192	64.9355	CaWRKY40b_peak_235
Pepper.v.1.55.chr03	255866953	255867138	186	255867015	4	6.63332	4.44294	2.52361	CaWRKY40b_peak_236
Pepper.v.1.55.chr04	3724661	3724846	186	3724744	3	5.59675	3.67013	1.82835	CaWRKY40b_peak_237
Pepper.v.1.55.chr04	7922283	7922469	187	7922365	3	6.03037	3.73921	1.99313	CaWRKY40b_peak_238
Pepper.v.1.55.chr04	13073261	13074551	1291	13073572	35	78.50246	32.8931	72.79037	CaWRKY40b_peak_239a
Pepper.v.1.55.chr04	13073261	13074551	1291	13073874	20	40.7221	19.08561	35.60417	CaWRKY40b_peak_239b
Pepper.v.1.55.chr04	13073261	13074551	1291	13074245	25	53.38937	23.77429	48.05555	CaWRKY40b_peak_239c
Pepper.v.1.55.chr04	17476784	17477139	356	17476972	14	23.3693	12.71446	18.57398	CaWRKY40b_peak_240
Pepper.v.1.55.chr04	17741981	17742166	186	17742148	4	7.88685	4.67401	3.59576	CaWRKY40b_peak_241
Pepper.v.1.55.chr04	20361151	20361339	189	20361235	7	13.01092	7.34026	8.48801	CaWRKY40b_peak_242
Pepper.v.1.55.chr04	23245793	23245978	186	23245968	3	4.90794	3.52479	1.38904	CaWRKY40b_peak_243
Pepper.v.1.55.chr04	28961578	28961763	186	28961716	5	9.1688	5.5052	4.80958	CaWRKY40b_peak_244
Pepper.v.1.55.chr04	28964664	28964852	189	28964836	7	13.78012	7.46348	9.23782	CaWRKY40b_peak_245
Pepper.v.1.55.chr04	32239873	32240229	357	32240065	30	16.4151	5.98525	11.78863	CaWRKY40b_peak_246
Pepper.v.1.55.chr04	39437037	39437222	186	39437211	4	7.12669	4.54765	2.9761	CaWRKY40b_peak_247
Pepper.v.1.55.chr04	40785139	40786494	1356	40785670	51	73.04031	28.74651	67.40972	CaWRKY40b_peak_248a
Pepper.v.1.55.chr04	40785139	40786494	1356	40786256	49	112.72498	45.09932	106.65003	CaWRKY40b_peak_248b
Pepper.v.1.55.chr04	40788868	40789197	330	40788990	12	24.18743	12.05297	19.3762	CaWRKY40b_peak_249
Pepper.v.1.55.chr04	41612260	41612461	202	41612357	7	13.88435	7.47842	9.32851	CaWRKY40b_peak_250
Pepper.v.1.55.chr04	41785601	41785823	223	41785700	5	8.49122	5.37142	4.16882	CaWRKY40b_peak_251
Pepper.v.1.55.chr04	43079388	43079573	186	43079471	5	9.1688	5.5052	4.80958	CaWRKY40b_peak_252
Pepper.v.1.55.chr04	47452856	47453041	186	47453028	5	9.1688	5.5052	4.80958	CaWRKY40b_peak_253
Pepper.v.1.55.chr04	54414775	54415130	356	54414975	12	21.16186	11.45557	16.42154	CaWRKY40b_peak_254
Pepper.v.1.55.chr04	54696238	54696618	381	54696427	16	10.63303	5.88751	6.20325	CaWRKY40b_peak_255
Pepper.v.1.55.chr04	55078658	55078849	192	55078808	6	10.73125	6.36187	6.2938	CaWRKY40b_peak_256
Pepper.v.1.55.chr04	56099468	56099653	186	56099555	4	6.95449	4.51333	2.81463	CaWRKY40b_peak_257
Pepper.v.1.55.chr04	57857482	57857667	186	57857563	3	6.03037	3.73921	1.99313	CaWRKY40b_peak_258
Pepper.v.1.55.chr04	61258654	61258839	186	61258788	5	9.2546	5.52013	4.89306	CaWRKY40b_peak_259
Pepper.v.1.55.chr04	63202171	63202969	799	63202316	13	17.30593	10.29777	12.65547	CaWRKY40b_peak_260a
Pepper.v.1.55.chr04	63202171	63202969	799	63202716	14	24.16769	12.94423	19.35711	CaWRKY40b_peak_260b
Pepper.v.1.55.chr04	64480211	64480396	186	64480299	4	7.39425	4.59657	3.18729	CaWRKY40b_peak_261
Pepper.v.1.55.chr04	73603806	73603991	186	73603883	4	6.47914	4.40599	2.38256	CaWRKY40b_peak_262
Pepper.v.1.55.chr04	76439657	76440003	347	76439821	20	20.62735	10.80394	15.89863	CaWRKY40b_peak_263
Pepper.v.1.55.chr04	77285436	77285621	186	77285517	3	5.90077	3.72014	1.99313	CaWRKY40b_peak_264
Pepper.v.1.55.chr04	77996923	77997387	465	77997202	15	27.29968	14.09916	22.42374	CaWRKY40b_peak_265
Pepper.v.1.55.chr04	96478981	96479323	343	96479128	4	7.39425	4.59657	3.18729	CaWRKY40b_peak_266
Pepper.v.1.55.chr04	107517254	107517462	209	107517348	7	11.61951	7.04958	7.14661	CaWRKY40b_peak_267
Pepper.v.1.55.chr04	110136725	110136910	186	110136815	4	7.29474	4.57898	3.12721	CaWRKY40b_peak_268
Pepper.v.1.55.chr04	110184818	110185003	186	110184965	4	6.36756	4.3779	2.31088	CaWRKY40b_peak_269
Pepper.v.1.55.chr04	110391497	110391682	186	110391587	4	7.88685	4.67401	3.59576	CaWRKY40b_peak_270
Pepper.v.1.55.chr04	110782104	110782289	186	110782195	4	7.88685	4.67401	3.59576	CaWRKY40b_peak_271
Pepper.v.1.55.chr04	119750662	119750847	186	119750754	6	9.51763	6.08453	5.14523	CaWRKY40b_peak_272
Pepper.v.1.55.chr04	121526368	121526553	186	121526453	5	8.97379	5.46965	4.63713	CaWRKY40b_peak_273
Pepper.v.1.55.chr04	129395851	129396036	186	129395949	4	7.88685	4.67401	3.59576	CaWRKY40b_peak_274
Pepper.v.1.55.chr04	130895884	130896223	340	130896054	10	18.284	9.92934	13.60874	CaWRKY40b_peak_275
Pepper.v.1.55.chr04	137196420	137197381	962	137196807	139	116.87693	15.25215	110.76175	CaWRKY40b_peak_276
Pepper.v.1.55.chr04	139968779	139968964	186	139968868	5	8.68122	5.41192	4.35319	CaWRKY40b_peak_277
Pepper.v.1.55.chr04	153675112	153675367	256	153675244	8	13.72463	7.99728	9.18253	CaWRKY40b_peak_278
Pepper.v.1.55.chr04	158238523	158238711	189	158238673	9	10.65047	7.12019	6.21602	CaWRKY40b_peak_279
Pepper.v.1.55.chr04	159316060	159316393	334	159316250	9	18.15219	9.34803	13.47871	CaWRKY40b_peak_280
Pepper.v.1.55.chr04	174852713	174853056	344	174852945	5	6.37277	4.72575	2.31213	CaWRKY40b_peak_281
Pepper.v.1.55.chr04	179476190	179476508	319	179476381	14	24.88545	13.13371	20.06035	CaWRKY40b_peak_282
Pepper.v.1.55.chr04	181375786	181376079	294	181375913	9	15.31545	8.81198	10.72333	CaWRKY40b_peak_283
Pepper.v.1.55.chr04	186743004	186743645	642	186743340	43	87.29455	37.29575	81.4649	CaWRKY40b_peak_284
Pepper.v.1.55.chr04	188248597	188248782	186	188248692	4	7.77265	4.65741	3.53602	CaWRKY40b_peak_285
Pepper.v.1.55.chr04	195955872	195956057	186	195955956	3	5.86317	3.71436	1.99313	CaWRKY40b_peak_286
Pepper.v.1.55.chr04	199304008	199304615	608	199304363	31	48.17053	22.78459	42.91458	CaWRKY40b_peak_287
Pepper.v.1.55.chr04	203214248	203214578	331	203214377	11	19.17734	10.57437	14.4791	CaWRKY40b_peak_288
Pepper.v.1.55.chr04	207596840	207597025	186	207596927	4	7.34337	4.58766	3.14713	CaWRKY40b_peak_289
Pepper.v.1.55.chr04	211405290	211405634	345	211405427	17	6.14165	3.38714	2.09973	CaWRKY40b_peak_290
Pepper.v.1.55.chr04	212166893	212167310	418	212167076	20	38.03944	18.50515	32.96954	CaWRKY40b_peak_291
Pepper.v.1.55.chr04	218990922	218991457	536	218991083	27	11.49859	4.47431	7.03473	CaWRKY40b_peak_292a
Pepper.v.1.55.chr04	218990922	218991457	536	218991338	28	9.22689	3.58003	4.86611	CaWRKY40b_peak_292b
Pepper.v.1.55.chr04	219038049	219038449	401	219038169	22	8.7937	3.99055	4.46202	CaWRKY40b_peak_293a
Pepper.v.1.55.chr04	219038049	219038449	401	219038242	19	4.73698	2.64508	1.30843	CaWRKY40b_peak_293b
Pepper.v.1.55.chr04	219038881	219039588	708	219039014	33	13.78751	4.60614	9.24508	CaWRKY40b_peak_294a
Pepper.v.1.55.chr04	219038881	219039588	708	219039462	27	13.19302	5.13852	8.66528	CaWRKY40b_peak_294b
Pepper.v.1.55.chr04	219039855	219040460	606	219039933	18	6.46412	3.43027	2.38256	CaWRKY40b_peak_295a
Pepper.v.1.55.chr04	219039855	219040460	606	219040266	41	20.04303	5.68994	15.33082	CaWRKY40b_peak_295b
Pepper.v.1.55.chr04	221307091	221307276	186	221307167	3	4.84916	3.51003	1.38904	CaWRKY40b_peak_296
Pepper.v.1.55.chr04	222261303	222261488	186	222261445	4	5.87064	4.23815	1.99313	CaWRKY40b_peak_297
Pepper.v.1.55.chr05	669929	670430	502	670237	12	5.84906	3.8441	1.99313	CaWRKY40b_peak_298
Pepper.v.1.55.chr05	948584	948769	186	948695	5	8.18163	5.30003	3.87043	CaWRKY40b_peak_299
Pepper.v.1.55.chr05	1575229	1575414	186	1575291	3	4.81909	3.50232	1.37801	CaWRKY40b_peak_300
Pepper.v.1.55.chr05	2739389	2739591	203	2739477	5	8.68122	5.41192	4.35319	CaWRKY40b_peak_301
Pepper.v.1.55.chr05	6156385	6156678	294	6156548	11	17.69608	10.17157	13.03611	CaWRKY40b_peak_302
Pepper.v.1.55.chr05	8712369	8712703	335	8712510	5	4.87638	4.01516	1.38904	CaWRKY40b_peak_303
Pepper.v.1.55.chr05	13006371	13006556	186	13006532	4	6.44377	4.39721	2.38195	CaWRKY40b_peak_304
Pepper.v.1.55.chr05	13163968	13164153	186	13164092	4	7.88685	4.67401	3.59576	CaWRKY40b_peak_305
Pepper.v.1.55.chr05	15640193	15640378	186	15640292	4	5.87064	4.23815	1.99313	CaWRKY40b_peak_306
Pepper.v.1.55.chr05	19049287	19049481	195	19049383	7	13.88435	7.47842	9.32851	CaWRKY40b_peak_307
Pepper.v.1.55.chr05	19508803	19508991	189	19508888	6	9.84535	6.16838	5.43234	CaWRKY40b_peak_308
Pepper.v.1.55.chr05	25295299	25295615	317	25295471	10	17.22754	9.69317	12.58003	CaWRKY40b_peak_309
Pepper.v.1.55.chr05	25360974	25361159	186	25361066	4	7.34337	4.58766	3.14713	CaWRKY40b_peak_310
Pepper.v.1.55.chr05	32405732	32405917	186	32405827	5	9.30459	5.52863	4.93929	CaWRKY40b_peak_311
Pepper.v.1.55.chr05	32696324	32696651	328	32696445	6	11.06094	6.42273	6.60712	CaWRKY40b_peak_312
Pepper.v.1.55.chr05	35210750	35210935	186	35210840	5	9.71441	5.59325	5.33447	CaWRKY40b_peak_313
Pepper.v.1.55.chr05	38985944	38986132	189	38986042	7	9.87935	6.53222	5.4617	CaWRKY40b_peak_314
Pepper.v.1.55.chr05	41271157	41271467	311	41271327	10	19.49084	10.15146	14.78879	CaWRKY40b_peak_315
Pepper.v.1.55.chr05	41272821	41273151	331	41272957	10	20.3503	10.28283	15.62387	CaWRKY40b_peak_316
Pepper.v.1.55.chr05	44584661	44584999	339	44584827	10	19.49084	10.15146	14.78879	CaWRKY40b_peak_317
Pepper.v.1.55.chr05	48135602	48135913	312	48135770	17	36.65185	16.82645	31.60882	CaWRKY40b_peak_318
Pepper.v.1.55.chr05	48521584	48521930	347	48521756	10	19.14666	10.09286	14.45437	CaWRKY40b_peak_319
Pepper.v.1.55.chr05	69345058	69345243	186	69345224	5	9.82222	5.60882	5.41776	CaWRKY40b_peak_320
Pepper.v.1.55.chr05	71585842	71587817	1976	71586179	29	45.90311	22.06664	40.6878	CaWRKY40b_peak_321a
Pepper.v.1.55.chr05	71585842	71587817	1976	71586936	40	70.2509	31.18871	64.66136	CaWRKY40b_peak_321b
Pepper.v.1.55.chr05	71585842	71587817	1976	71587372	22	46.28942	21.0633	41.06735	CaWRKY40b_peak_321c
Pepper.v.1.55.chr05	71585842	71587817	1976	71587601	28	49.84444	23.67929	44.55572	CaWRKY40b_peak_321d
Pepper.v.1.55.chr05	73239073	73239415	343	73239255	6	7.78923	5.51338	3.54984	CaWRKY40b_peak_322
Pepper.v.1.55.chr05	105123569	105123754	186	105123661	4	6.36756	4.3779	2.31088	CaWRKY40b_peak_323
Pepper.v.1.55.chr05	105250296	105250531	236	105250411	8	14.27743	8.11788	9.7094	CaWRKY40b_peak_324
Pepper.v.1.55.chr05	109511009	109511219	211	109511037	5	8.12895	5.28719	3.81926	CaWRKY40b_peak_325
Pepper.v.1.55.chr05	113892850	113893035	186	113893014	9	9.45411	6.49656	5.08538	CaWRKY40b_peak_326
Pepper.v.1.55.chr05	127276489	127276674	186	127276580	4	7.88685	4.67401	3.59576	CaWRKY40b_peak_327
Pepper.v.1.55.chr05	130280890	130281476	587	130281235	18	37.00262	17.43312	31.95168	CaWRKY40b_peak_328
Pepper.v.1.55.chr05	130356557	130356742	186	130356718	5	9.82222	5.60882	5.41776	CaWRKY40b_peak_329
Pepper.v.1.55.chr05	133210823	133211066	244	133210942	5	9.82222	5.60882	5.41776	CaWRKY40b_peak_330
Pepper.v.1.55.chr05	137112737	137112964	228	137112832	4	5.40228	4.08264	1.76837	CaWRKY40b_peak_331
Pepper.v.1.55.chr05	139891386	139891571	186	139891518	5	9.1688	5.5052	4.80958	CaWRKY40b_peak_332
Pepper.v.1.55.chr05	141190662	141190993	332	141190886	10	14.82294	8.9818	10.24754	CaWRKY40b_peak_333
Pepper.v.1.55.chr05	146793365	146793550	186	146793529	4	6.47914	4.40599	2.38256	CaWRKY40b_peak_334
Pepper.v.1.55.chr05	148980784	148980969	186	148980928	4	7.34337	4.58766	3.14713	CaWRKY40b_peak_335
Pepper.v.1.55.chr05	150044909	150045421	513	150045182	20	41.71873	19.26818	36.5803	CaWRKY40b_peak_336
Pepper.v.1.55.chr05	150045700	150047714	2015	150046188	35	65.00785	29.39498	59.49261	CaWRKY40b_peak_337a
Pepper.v.1.55.chr05	150045700	150047714	2015	150046496	20	35.64948	17.86421	30.6234	CaWRKY40b_peak_337b
Pepper.v.1.55.chr05	150045700	150047714	2015	150047124	21	40.94167	19.54892	35.82155	CaWRKY40b_peak_337c
Pepper.v.1.55.chr05	150048797	150049288	492	150049054	14	27.84818	13.76299	22.95723	CaWRKY40b_peak_338
Pepper.v.1.55.chr05	150049400	150049715	316	150049528	8	15.01193	8.25779	10.42578	CaWRKY40b_peak_339
Pepper.v.1.55.chr05	161090518	161090724	207	161090611	5	9.1688	5.5052	4.80958	CaWRKY40b_peak_340
Pepper.v.1.55.chr05	161318176	161318435	260	161318280	4	6.63332	4.44294	2.52361	CaWRKY40b_peak_341
Pepper.v.1.55.chr05	165899005	165899196	192	165899132	5	8.88669	5.45303	4.55176	CaWRKY40b_peak_342
Pepper.v.1.55.chr05	168698567	168699462	896	168698763	8	13.24193	7.88022	8.71313	CaWRKY40b_peak_343a
Pepper.v.1.55.chr05	168698567	168699462	896	168699024	11	16.55115	9.79833	11.91978	CaWRKY40b_peak_343b
Pepper.v.1.55.chr05	168698567	168699462	896	168699321	10	16.45448	9.49244	11.82623	CaWRKY40b_peak_343c
Pepper.v.1.55.chr05	172373994	172374203	210	172374149	6	9.68823	6.12906	5.30924	CaWRKY40b_peak_344
Pepper.v.1.55.chr05	182131291	182131477	187	182131445	6	10.73125	6.36187	6.2938	CaWRKY40b_peak_345
Pepper.v.1.55.chr05	187627797	187628127	331	187627996	8	15.99542	8.41322	11.37282	CaWRKY40b_peak_346
Pepper.v.1.55.chr05	187628522	187629208	687	187628832	16	32.3757	15.59805	27.40372	CaWRKY40b_peak_347a
Pepper.v.1.55.chr05	187628522	187629208	687	187629004	16	24.33833	13.38964	19.52515	CaWRKY40b_peak_347b
Pepper.v.1.55.chr05	193727926	193728119	194	193728027	7	13.88435	7.47842	9.32851	CaWRKY40b_peak_348
Pepper.v.1.55.chr05	199344980	199345165	186	199345082	5	5.98773	4.5642	1.99313	CaWRKY40b_peak_349
Pepper.v.1.55.chr05	199853167	199853559	393	199853407	15	23.78682	13.06444	18.98037	CaWRKY40b_peak_350
Pepper.v.1.55.chr05	202192839	202193126	288	202193000	8	13.44466	7.93078	8.9078	CaWRKY40b_peak_351
Pepper.v.1.55.chr05	207304801	207305283	483	207304972	23	44.73486	21.14874	39.53434	CaWRKY40b_peak_352
Pepper.v.1.55.chr05	207305710	207306033	324	207305904	6	11.06094	6.42273	6.60712	CaWRKY40b_peak_353
Pepper.v.1.55.chr05	210298870	210299055	186	210299031	7	8.74492	6.0856	4.41377	CaWRKY40b_peak_354
Pepper.v.1.55.chr05	211805497	211805688	192	211805599	6	11.82435	6.54362	7.33121	CaWRKY40b_peak_355
Pepper.v.1.55.chr05	214557035	214557221	187	214557113	4	6.47914	4.40599	2.38256	CaWRKY40b_peak_356
Pepper.v.1.55.chr05	217255486	217255828	343	217255624	10	15.87108	9.32394	11.26319	CaWRKY40b_peak_357
Pepper.v.1.55.chr05	218733363	218733689	327	218733532	14	29.49224	14.02204	24.57313	CaWRKY40b_peak_358
Pepper.v.1.55.chr05	222988388	222988613	226	222988504	5	9.82222	5.60882	5.41776	CaWRKY40b_peak_359
Pepper.v.1.55.chr05	224793681	224793883	203	224793785	9	16.14368	8.99951	11.52007	CaWRKY40b_peak_360
Pepper.v.1.55.chr05	225281372	225281694	323	225281539	6	9.84535	6.16838	5.43234	CaWRKY40b_peak_361
Pepper.v.1.55.chr05	226137682	226137867	186	226137773	5	9.1688	5.5052	4.80958	CaWRKY40b_peak_362
Pepper.v.1.55.chr05	231457031	231457490	460	231457199	14	23.3693	12.71446	18.57398	CaWRKY40b_peak_363
Pepper.v.1.55.chr05	231643261	231643688	428	231643459	103	81.61308	13.13012	75.86091	CaWRKY40b_peak_364
Pepper.v.1.55.chr05	232376307	232376492	186	232376357	5	6.37277	4.72575	2.31213	CaWRKY40b_peak_365
Pepper.v.1.55.chr05	233325269	233325475	207	233325383	18	5.23982	2.91072	1.6675	CaWRKY40b_peak_366
Pepper.v.1.55.chr05	233342165	233342350	186	233342258	17	8.7086	4.63466	4.38002	CaWRKY40b_peak_367
Pepper.v.1.55.chr06	85706	85893	188	85790	4	7.34337	4.58766	3.14713	CaWRKY40b_peak_368
Pepper.v.1.55.chr06	1849530	1849715	186	1849607	8	10.04878	6.77882	5.63015	CaWRKY40b_peak_369
Pepper.v.1.55.chr06	3313524	3313715	192	3313610	8	7.61613	5.52433	3.39188	CaWRKY40b_peak_370
Pepper.v.1.55.chr06	5206833	5207131	299	5207030	3	6.03037	3.73921	1.99313	CaWRKY40b_peak_371
Pepper.v.1.55.chr06	7547859	7548044	186	7547946	5	6.37277	4.72575	2.31213	CaWRKY40b_peak_372
Pepper.v.1.55.chr06	7703192	7703429	238	7703299	6	11.82435	6.54362	7.33121	CaWRKY40b_peak_373
Pepper.v.1.55.chr06	7703646	7704762	1117	7704015	6	11.82435	6.54362	7.33121	CaWRKY40b_peak_374a
Pepper.v.1.55.chr06	7703646	7704762	1117	7704420	18	37.00262	17.43312	31.95168	CaWRKY40b_peak_374b
Pepper.v.1.55.chr06	7947425	7947623	199	7947561	5	9.82222	5.60882	5.41776	CaWRKY40b_peak_375
Pepper.v.1.55.chr06	8063071	8063256	186	8063126	3	5.55796	3.66318	1.82835	CaWRKY40b_peak_376
Pepper.v.1.55.chr06	8161370	8161584	215	8161532	6	11.06094	6.42273	6.60712	CaWRKY40b_peak_377
Pepper.v.1.55.chr06	16049192	16049377	186	16049280	4	7.34337	4.58766	3.14713	CaWRKY40b_peak_378
Pepper.v.1.55.chr06	16135017	16135202	186	16135022	5	7.39599	5.08578	3.18729	CaWRKY40b_peak_379
Pepper.v.1.55.chr06	19406025	19406279	255	19406173	7	8.74492	6.0856	4.41377	CaWRKY40b_peak_380
Pepper.v.1.55.chr06	21677235	21677440	206	21677344	12	23.43293	11.92792	18.63128	CaWRKY40b_peak_381
Pepper.v.1.55.chr06	30868883	30869068	186	30868966	4	7.34337	4.58766	3.14713	CaWRKY40b_peak_382
Pepper.v.1.55.chr06	32581940	32582125	186	32582031	3	5.4097	3.63535	1.76837	CaWRKY40b_peak_383
Pepper.v.1.55.chr06	34347884	34348454	571	34347991	5	7.4564	5.10406	3.24414	CaWRKY40b_peak_384a
Pepper.v.1.55.chr06	34347884	34348454	571	34348272	23	33.39632	17.08845	28.41207	CaWRKY40b_peak_384b
Pepper.v.1.55.chr06	39296289	39296490	202	39296381	6	11.82435	6.54362	7.33121	CaWRKY40b_peak_385
Pepper.v.1.55.chr06	50600601	50600786	186	50600742	3	5.55796	3.66318	1.82835	CaWRKY40b_peak_386
Pepper.v.1.55.chr06	61632695	61633021	327	61632895	5	6.37277	4.72575	2.31213	CaWRKY40b_peak_387
Pepper.v.1.55.chr06	62240692	62241190	499	62240918	29	43.03357	20.69826	37.87075	CaWRKY40b_peak_388
Pepper.v.1.55.chr06	75835244	75835682	439	75835469	28	52.63596	24.58129	47.30704	CaWRKY40b_peak_389
Pepper.v.1.55.chr06	79829180	79829372	193	79829294	5	9.1688	5.5052	4.80958	CaWRKY40b_peak_390
Pepper.v.1.55.chr06	86851990	86852175	186	86852061	3	5.27355	3.60795	1.67804	CaWRKY40b_peak_391
Pepper.v.1.55.chr06	89036663	89036903	241	89036776	7	13.01092	7.34026	8.48801	CaWRKY40b_peak_392
Pepper.v.1.55.chr06	90925086	90925271	186	90925259	5	8.54673	5.38351	4.22299	CaWRKY40b_peak_393
Pepper.v.1.55.chr06	91043624	91043823	200	91043721	3	5.55796	3.66318	1.82835	CaWRKY40b_peak_394
Pepper.v.1.55.chr06	96272636	96272858	223	96272780	4	6.78012	4.47618	2.6597	CaWRKY40b_peak_395
Pepper.v.1.55.chr06	97222441	97222661	221	97222558	12	24.43159	12.09045	19.61661	CaWRKY40b_peak_396
Pepper.v.1.55.chr06	106032485	106032670	186	106032657	5	9.627	5.58021	5.25026	CaWRKY40b_peak_397
Pepper.v.1.55.chr06	128043752	128044083	332	128043925	11	19.17734	10.57437	14.4791	CaWRKY40b_peak_398
Pepper.v.1.55.chr06	134910187	134910372	186	134910362	3	5.55796	3.66318	1.82835	CaWRKY40b_peak_399
Pepper.v.1.55.chr06	152694226	152694411	186	152694382	5	9.57035	5.57154	5.19662	CaWRKY40b_peak_400
Pepper.v.1.55.chr06	155615701	155615894	194	155615789	7	13.88435	7.47842	9.32851	CaWRKY40b_peak_401
Pepper.v.1.55.chr06	160180950	160181135	186	160181041	5	9.82222	5.60882	5.41776	CaWRKY40b_peak_402
Pepper.v.1.55.chr06	169554518	169554703	186	169554604	3	6.03037	3.73921	1.99313	CaWRKY40b_peak_403
Pepper.v.1.55.chr06	171590151	171590407	257	171590306	5	7.11775	4.99746	2.96792	CaWRKY40b_peak_404
Pepper.v.1.55.chr06	179073188	179073373	186	179073335	5	7.99461	5.25348	3.70011	CaWRKY40b_peak_405
Pepper.v.1.55.chr06	181388501	181388821	321	181388670	11	22.58616	11.21763	17.80977	CaWRKY40b_peak_406
Pepper.v.1.55.chr06	181730579	181730764	186	181730665	3	5.8083	3.70573	1.9868	CaWRKY40b_peak_407
Pepper.v.1.55.chr06	192654851	192655051	201	192655021	7	9.2632	6.30101	4.8988	CaWRKY40b_peak_408
Pepper.v.1.55.chr06	192988184	192988380	197	192988320	4	5.87064	4.23815	1.99313	CaWRKY40b_peak_409
Pepper.v.1.55.chr06	198972302	198972487	186	198972401	4	6.47914	4.40599	2.38256	CaWRKY40b_peak_410
Pepper.v.1.55.chr06	199859577	199859762	186	199859745	6	8.98782	5.93341	4.64519	CaWRKY40b_peak_411
Pepper.v.1.55.chr06	201218549	201218734	186	201218713	5	9.1688	5.5052	4.80958	CaWRKY40b_peak_412
Pepper.v.1.55.chr06	205071625	205071810	186	205071712	4	7.41472	4.60011	3.20491	CaWRKY40b_peak_413
Pepper.v.1.55.chr06	213180072	213180257	186	213180154	3	6.03037	3.73921	1.99313	CaWRKY40b_peak_414
Pepper.v.1.55.chr06	215298496	215298861	366	215298705	16	27.29504	14.40972	22.42244	CaWRKY40b_peak_415
Pepper.v.1.55.chr06	215960304	215960639	336	215960434	6	9.84535	6.16838	5.43234	CaWRKY40b_peak_416
Pepper.v.1.55.chr06	219746966	219747151	186	219747043	11	5.35585	3.69573	1.75302	CaWRKY40b_peak_417
Pepper.v.1.55.chr06	220208943	220209246	304	220209068	8	10.20298	6.8463	5.7802	CaWRKY40b_peak_418
Pepper.v.1.55.chr06	223798342	223798543	202	223798434	6	8.98782	5.93341	4.64519	CaWRKY40b_peak_419
Pepper.v.1.55.chr06	225957384	225957572	189	225957545	7	13.62346	7.44027	9.08249	CaWRKY40b_peak_420
Pepper.v.1.55.chr06	226221522	226221920	399	226221781	8	11.48309	7.34875	7.01965	CaWRKY40b_peak_421
Pepper.v.1.55.chr06	227098454	227098641	188	227098544	4	6.47914	4.40599	2.38256	CaWRKY40b_peak_422
Pepper.v.1.55.chr06	227785070	227785449	380	227785266	14	23.5225	12.76015	18.72011	CaWRKY40b_peak_423
Pepper.v.1.55.chr06	229609618	229609966	349	229609832	11	11.71527	7.57472	7.23986	CaWRKY40b_peak_424
Pepper.v.1.55.chr06	230197140	230197357	218	230197247	8	11.48309	7.34875	7.01965	CaWRKY40b_peak_425
Pepper.v.1.55.chr06	230421571	230421909	339	230421736	17	29.29585	15.25735	24.38907	CaWRKY40b_peak_426
Pepper.v.1.55.chr06	230739997	230741940	1944	230740235	15	25.31903	13.56209	20.4822	CaWRKY40b_peak_427a
Pepper.v.1.55.chr06	230739997	230741940	1944	230740693	16	25.66599	13.88096	20.81982	CaWRKY40b_peak_427b
Pepper.v.1.55.chr06	230739997	230741940	1944	230741242	12	19.42904	10.98072	14.72814	CaWRKY40b_peak_427c
Pepper.v.1.55.chr06	230739997	230741940	1944	230741661	12	18.31404	10.61485	13.63571	CaWRKY40b_peak_427d
Pepper.v.1.55.chr06	230743202	230743526	325	230743373	10	15.87108	9.32394	11.26319	CaWRKY40b_peak_428
Pepper.v.1.55.chr07	1156169	1156354	186	1156261	3	5.31324	3.61612	1.71403	CaWRKY40b_peak_429
Pepper.v.1.55.chr07	2128394	2128633	240	2128477	5	6.8312	4.89916	2.70469	CaWRKY40b_peak_430
Pepper.v.1.55.chr07	2751727	2751912	186	2751822	3	4.90794	3.52479	1.38904	CaWRKY40b_peak_431
Pepper.v.1.55.chr07	3439403	3439629	227	3439505	4	6.95449	4.51333	2.81463	CaWRKY40b_peak_432
Pepper.v.1.55.chr07	3529670	3529855	186	3529751	3	5.27355	3.60795	1.67804	CaWRKY40b_peak_433
Pepper.v.1.55.chr07	3530858	3531052	195	3530958	3	5.4097	3.63535	1.76837	CaWRKY40b_peak_434
Pepper.v.1.55.chr07	3851716	3851901	186	3851828	5	7.39599	5.08578	3.18729	CaWRKY40b_peak_435
Pepper.v.1.55.chr07	8782277	8782480	204	8782383	5	7.39599	5.08578	3.18729	CaWRKY40b_peak_436
Pepper.v.1.55.chr07	8848335	8848520	186	8848441	5	8.49122	5.37142	4.16882	CaWRKY40b_peak_437
Pepper.v.1.55.chr07	11125433	11125618	186	11125542	5	7.39599	5.08578	3.18729	CaWRKY40b_peak_438
Pepper.v.1.55.chr07	11140844	11141029	186	11141000	9	8.27534	5.81721	3.96315	CaWRKY40b_peak_439
Pepper.v.1.55.chr07	17428646	17428955	310	17428802	10	13.25125	8.3677	8.72115	CaWRKY40b_peak_440
Pepper.v.1.55.chr07	17429485	17429844	360	17429668	20	17.83229	9.11754	13.1694	CaWRKY40b_peak_441
Pepper.v.1.55.chr07	19811815	19812049	235	19811930	5	6.37277	4.72575	2.31213	CaWRKY40b_peak_442
Pepper.v.1.55.chr07	19814893	19815152	260	19815016	9	15.62689	8.88587	11.02811	CaWRKY40b_peak_443
Pepper.v.1.55.chr07	19840276	19840607	332	19840469	6	4.977	4.07205	1.44677	CaWRKY40b_peak_444
Pepper.v.1.55.chr07	19844453	19844730	278	19844618	8	10.20298	6.8463	5.7802	CaWRKY40b_peak_445
Pepper.v.1.55.chr07	19845116	19845587	472	19845282	20	17.26121	8.77511	12.61336	CaWRKY40b_peak_446
Pepper.v.1.55.chr07	19845677	19845937	261	19845826	16	15.36516	8.74605	10.77172	CaWRKY40b_peak_447
Pepper.v.1.55.chr07	19847332	19847661	330	19847485	10	11.16338	7.36112	6.70811	CaWRKY40b_peak_448
Pepper.v.1.55.chr07	19848470	19848913	444	19848566	6	7.63485	5.45087	3.40941	CaWRKY40b_peak_449
Pepper.v.1.55.chr07	19853195	19853519	325	19853391	10	8.04787	5.53132	3.75244	CaWRKY40b_peak_450
Pepper.v.1.55.chr07	19855420	19855760	341	19855586	26	25.86923	11.95583	21.02138	CaWRKY40b_peak_451
Pepper.v.1.55.chr07	19855855	19856043	189	19855946	8	8.18371	5.8469	3.87223	CaWRKY40b_peak_452
Pepper.v.1.55.chr07	19859764	19859960	197	19859856	8	12.33775	7.62868	7.83623	CaWRKY40b_peak_453
Pepper.v.1.55.chr07	19886544	19886729	186	19886673	7	7.55752	5.51953	3.33678	CaWRKY40b_peak_454
Pepper.v.1.55.chr07	19886783	19886970	188	19886876	4	5.5542	4.13575	1.82835	CaWRKY40b_peak_455
Pepper.v.1.55.chr07	19887041	19887232	192	19887120	5	7.58043	5.14061	3.35828	CaWRKY40b_peak_456
Pepper.v.1.55.chr07	19894207	19894526	320	19894323	4	5.40228	4.08264	1.76837	CaWRKY40b_peak_457
Pepper.v.1.55.chr07	19898323	19898581	259	19898418	5	6.37277	4.72575	2.31213	CaWRKY40b_peak_458
Pepper.v.1.55.chr07	19898791	19898976	186	19898876	5	7.39599	5.08578	3.18729	CaWRKY40b_peak_459
Pepper.v.1.55.chr07	19904928	19905218	291	19905064	7	13.88435	7.47842	9.32851	CaWRKY40b_peak_460
Pepper.v.1.55.chr07	19911691	19912128	438	19911930	4	5.87064	4.23815	1.99313	CaWRKY40b_peak_461
Pepper.v.1.55.chr07	19934492	19934830	339	19934676	22	42.48431	20.26754	37.32549	CaWRKY40b_peak_462
Pepper.v.1.55.chr07	25600577	25600766	190	25600663	5	8.12895	5.28719	3.81926	CaWRKY40b_peak_463
Pepper.v.1.55.chr07	27013508	27013981	474	27013713	40	94.111	37.89573	88.21507	CaWRKY40b_peak_464
Pepper.v.1.55.chr07	27014257	27014454	198	27014346	5	9.1688	5.5052	4.80958	CaWRKY40b_peak_465
Pepper.v.1.55.chr07	27316025	27316315	291	27316145	21	8.47463	3.9719	4.15469	CaWRKY40b_peak_466
Pepper.v.1.55.chr07	27626038	27626258	221	27626229	3	5.1477	3.58095	1.58012	CaWRKY40b_peak_467
Pepper.v.1.55.chr07	29775929	29776116	188	29776012	4	7.88685	4.67401	3.59576	CaWRKY40b_peak_468
Pepper.v.1.55.chr07	32867969	32868364	396	32868155	36	70.7912	31.36234	65.18758	CaWRKY40b_peak_469
Pepper.v.1.55.chr07	34716450	34716747	298	34716604	7	13.01092	7.34026	8.48801	CaWRKY40b_peak_470
Pepper.v.1.55.chr07	39518044	39518401	358	39518235	18	24.72129	13.52835	19.90377	CaWRKY40b_peak_471
Pepper.v.1.55.chr07	47245401	47245610	210	47245537	18	7.36296	3.83474	3.16618	CaWRKY40b_peak_472
Pepper.v.1.55.chr07	48245552	48245876	325	48245726	8	13.99104	8.05713	9.43023	CaWRKY40b_peak_473
Pepper.v.1.55.chr07	51908455	51908789	335	51908582	17	28.44647	14.99237	23.54949	CaWRKY40b_peak_474
Pepper.v.1.55.chr07	67992554	67992975	422	67992782	12	23.84011	11.99718	19.0325	CaWRKY40b_peak_475
Pepper.v.1.55.chr07	77647427	77647641	215	77647590	6	10.49108	6.3139	6.06408	CaWRKY40b_peak_476
Pepper.v.1.55.chr07	80242833	80243018	186	80242953	4	7.29474	4.57898	3.12721	CaWRKY40b_peak_477
Pepper.v.1.55.chr07	82866947	82867313	367	82867118	15	23.78682	13.06444	18.98037	CaWRKY40b_peak_478
Pepper.v.1.55.chr07	83535100	83535427	328	83535275	34	62.80308	28.57845	57.32239	CaWRKY40b_peak_479
Pepper.v.1.55.chr07	89004202	89004418	217	89004318	5	5.98773	4.5642	1.99313	CaWRKY40b_peak_480
Pepper.v.1.55.chr07	99895179	99897928	2750	99895411	30	49.61777	23.58171	44.33381	CaWRKY40b_peak_481a
Pepper.v.1.55.chr07	99895179	99897928	2750	99895887	27	40.66125	19.93652	35.54456	CaWRKY40b_peak_481b
Pepper.v.1.55.chr07	99895179	99897928	2750	99896124	35	68.84764	30.62436	63.27494	CaWRKY40b_peak_481c
Pepper.v.1.55.chr07	99895179	99897928	2750	99897011	31	51.62532	24.34241	46.31377	CaWRKY40b_peak_481d
Pepper.v.1.55.chr07	99895179	99897928	2750	99897445	29	43.03357	20.69826	37.87075	CaWRKY40b_peak_481e
Pepper.v.1.55.chr07	99898092	99899081	990	99898285	15	29.34042	14.54142	24.43244	CaWRKY40b_peak_482a
Pepper.v.1.55.chr07	99898092	99899081	990	99898556	17	34.50051	16.48432	29.49548	CaWRKY40b_peak_482b
Pepper.v.1.55.chr07	99899854	99900498	645	99900306	44	85.35123	36.74373	79.54219	CaWRKY40b_peak_483
Pepper.v.1.55.chr07	99901574	99901953	380	99901779	17	29.29585	15.25735	24.38907	CaWRKY40b_peak_484
Pepper.v.1.55.chr07	104655881	104656460	580	104656212	25	49.28845	22.91114	44.01138	CaWRKY40b_peak_485
Pepper.v.1.55.chr07	107957373	107957613	241	107957438	5	8.45488	5.36339	4.13519	CaWRKY40b_peak_486
Pepper.v.1.55.chr07	108569604	108569944	341	108569763	42	36.9308	12.38591	31.88597	CaWRKY40b_peak_487
Pepper.v.1.55.chr07	118920758	118920943	186	118920845	3	5.9588	3.72883	1.99313	CaWRKY40b_peak_488
Pepper.v.1.55.chr07	122265501	122265723	223	122265602	7	7.55752	5.51953	3.33678	CaWRKY40b_peak_489
Pepper.v.1.55.chr07	126110921	126111215	295	126111035	9	18.15219	9.34803	13.47871	CaWRKY40b_peak_490
Pepper.v.1.55.chr07	135411851	135412038	188	135412029	5	9.82222	5.60882	5.41776	CaWRKY40b_peak_491
Pepper.v.1.55.chr07	139942541	139942726	186	139942608	3	4.90794	3.52479	1.38904	CaWRKY40b_peak_492
Pepper.v.1.55.chr07	144097304	144097489	186	144097389	3	4.90794	3.52479	1.38904	CaWRKY40b_peak_493
Pepper.v.1.55.chr07	146831109	146831472	364	146831280	23	33.39632	17.08845	28.41207	CaWRKY40b_peak_494
Pepper.v.1.55.chr07	148633985	148634170	186	148634074	5	7.39599	5.08578	3.18729	CaWRKY40b_peak_495
Pepper.v.1.55.chr07	159034428	159034616	189	159034578	7	13.66196	7.44606	9.12074	CaWRKY40b_peak_496
Pepper.v.1.55.chr07	165951307	165951634	328	165951492	8	15.99542	8.41322	11.37282	CaWRKY40b_peak_497
Pepper.v.1.55.chr07	171821799	171822489	691	171822109	16	32.3757	15.59805	27.40372	CaWRKY40b_peak_498
Pepper.v.1.55.chr07	174824073	174824258	186	174824212	4	7.72445	4.65017	3.49077	CaWRKY40b_peak_499
Pepper.v.1.55.chr07	178372692	178372877	186	178372819	4	6.47914	4.40599	2.38256	CaWRKY40b_peak_500
Pepper.v.1.55.chr07	179678121	179678321	201	179678288	12	13.97109	8.69951	9.41222	CaWRKY40b_peak_501
Pepper.v.1.55.chr07	179885480	179885717	238	179885594	10	19.14666	10.09286	14.45437	CaWRKY40b_peak_502
Pepper.v.1.55.chr07	183609338	183609523	186	183609485	4	6.93802	4.50993	2.79969	CaWRKY40b_peak_503
Pepper.v.1.55.chr07	188099130	188099451	322	188099259	6	8.32648	5.71569	4.00763	CaWRKY40b_peak_504
Pepper.v.1.55.chr07	191303309	191303494	186	191303392	6	6.30425	4.82959	2.25515	CaWRKY40b_peak_505
Pepper.v.1.55.chr07	198705518	198705704	187	198705608	5	9.82222	5.60882	5.41776	CaWRKY40b_peak_506
Pepper.v.1.55.chr07	206809192	206809534	343	206809371	9	18.15219	9.34803	13.47871	CaWRKY40b_peak_507
Pepper.v.1.55.chr07	212142426	212142614	189	212142518	6	8.98782	5.93341	4.64519	CaWRKY40b_peak_508
Pepper.v.1.55.chr07	213334832	213335164	333	213335018	18	37.59885	17.53434	32.53664	CaWRKY40b_peak_509
Pepper.v.1.55.chr07	220896529	220896827	299	220896720	3	5.59675	3.67013	1.82835	CaWRKY40b_peak_510
Pepper.v.1.55.chr07	226322872	226323194	323	226323023	5	9.1688	5.5052	4.80958	CaWRKY40b_peak_511
Pepper.v.1.55.chr07	226793420	226793767	348	226793626	13	27.15953	13.08724	22.29092	CaWRKY40b_peak_512
Pepper.v.1.55.chr07	227107075	227107303	229	227107199	6	7.78923	5.51338	3.54984	CaWRKY40b_peak_513
Pepper.v.1.55.chr07	228179330	228179602	273	228179480	5	7.39599	5.08578	3.18729	CaWRKY40b_peak_514
Pepper.v.1.55.chr07	229683646	229683831	186	229683716	3	4.83907	3.50746	1.38904	CaWRKY40b_peak_515
Pepper.v.1.55.chr08	19326	19511	186	19462	5	8.12895	5.28719	3.81926	CaWRKY40b_peak_516
Pepper.v.1.55.chr08	3796994	3797179	186	3797084	3	4.90794	3.52479	1.38904	CaWRKY40b_peak_517
Pepper.v.1.55.chr08	12669707	12669898	192	12669842	5	8.49122	5.37142	4.16882	CaWRKY40b_peak_518
Pepper.v.1.55.chr08	30347477	30347662	186	30347568	7	7.55752	5.51953	3.33678	CaWRKY40b_peak_519
Pepper.v.1.55.chr08	30560857	30561062	206	30560968	4	6.84186	4.48962	2.71503	CaWRKY40b_peak_520
Pepper.v.1.55.chr08	30629947	30630165	219	30630043	4	6.47914	4.40599	2.38256	CaWRKY40b_peak_521
Pepper.v.1.55.chr08	51315683	51315868	186	51315773	4	5.87064	4.23815	1.99313	CaWRKY40b_peak_522
Pepper.v.1.55.chr08	62196099	62196284	186	62196197	5	8.12895	5.28719	3.81926	CaWRKY40b_peak_523
Pepper.v.1.55.chr08	63579017	63579345	329	63579148	4	6.47914	4.40599	2.38256	CaWRKY40b_peak_524
Pepper.v.1.55.chr08	75265056	75265241	186	75265187	4	6.47914	4.40599	2.38256	CaWRKY40b_peak_525
Pepper.v.1.55.chr08	85367826	85368408	583	85368055	37	73.11635	32.20997	67.47842	CaWRKY40b_peak_526
Pepper.v.1.55.chr08	85496112	85496299	188	85496192	4	7.34337	4.58766	3.14713	CaWRKY40b_peak_527
Pepper.v.1.55.chr08	93721039	93721224	186	93721129	3	5.59675	3.67013	1.82835	CaWRKY40b_peak_528
Pepper.v.1.55.chr08	118921658	118921843	186	118921786	5	7.39599	5.08578	3.18729	CaWRKY40b_peak_529
Pepper.v.1.55.chr08	119040693	119041026	334	119040884	12	23.43293	11.92792	18.63128	CaWRKY40b_peak_530
Pepper.v.1.55.chr08	121850018	121850203	186	121850114	3	5.1969	3.5917	1.62656	CaWRKY40b_peak_531
Pepper.v.1.55.chr08	121854176	121854361	186	121854255	3	4.90794	3.52479	1.38904	CaWRKY40b_peak_532
Pepper.v.1.55.chr08	121911065	121911250	186	121911197	4	6.33048	4.36831	2.28043	CaWRKY40b_peak_533
Pepper.v.1.55.chr08	123978421	123978607	187	123978589	5	9.1338	5.49898	4.7867	CaWRKY40b_peak_534
Pepper.v.1.55.chr08	125184688	125184874	187	125184797	4	7.34337	4.58766	3.14713	CaWRKY40b_peak_535
Pepper.v.1.55.chr08	125442539	125442724	186	125442624	4	5.02254	3.93813	1.48401	CaWRKY40b_peak_536
Pepper.v.1.55.chr08	132310981	132311180	200	132311069	6	8.32648	5.71569	4.00763	CaWRKY40b_peak_537
Pepper.v.1.55.chr08	136104751	136105059	309	136104910	23	48.94232	22.02078	43.67543	CaWRKY40b_peak_538
Pepper.v.1.55.chr08	136338067	136338258	192	136338165	14	16.35867	9.74483	11.73235	CaWRKY40b_peak_539
Pepper.v.1.55.chr08	136683498	136683683	186	136683582	3	4.90794	3.52479	1.38904	CaWRKY40b_peak_540
Pepper.v.1.55.chr08	140127574	140127759	186	140127746	5	9.82222	5.60882	5.41776	CaWRKY40b_peak_541
Pepper.v.1.55.chr08	141605835	141606020	186	141605918	4	7.29474	4.57898	3.12721	CaWRKY40b_peak_542
Pepper.v.1.55.chr08	142599958	142600306	349	142600130	8	15.99542	8.41322	11.37282	CaWRKY40b_peak_543
Pepper.v.1.55.chr09	870	1212	343	1092	20	9.61902	4.61514	5.24487	CaWRKY40b_peak_544
Pepper.v.1.55.chr09	138488	138673	186	138663	4	6.47914	4.40599	2.38256	CaWRKY40b_peak_545
Pepper.v.1.55.chr09	450783	450968	186	450871	3	4.90794	3.52479	1.38904	CaWRKY40b_peak_546
Pepper.v.1.55.chr09	1102536	1102808	273	1102634	4	6.46982	4.40369	2.38256	CaWRKY40b_peak_547
Pepper.v.1.55.chr09	1852430	1852669	240	1852535	4	6.78012	4.47618	2.6597	CaWRKY40b_peak_548
Pepper.v.1.55.chr09	2576323	2576530	208	2576415	3	5.72064	3.69144	1.91412	CaWRKY40b_peak_549
Pepper.v.1.55.chr09	2863832	2864054	223	2863959	3	4.92152	3.52814	1.39265	CaWRKY40b_peak_550
Pepper.v.1.55.chr09	3151178	3151363	186	3151263	5	8.31454	5.33152	3.9999	CaWRKY40b_peak_551
Pepper.v.1.55.chr09	3865785	3866073	289	3865930	12	19.18145	10.90373	14.48294	CaWRKY40b_peak_552
Pepper.v.1.55.chr09	3870384	3870579	196	3870525	5	9.1688	5.5052	4.80958	CaWRKY40b_peak_553
Pepper.v.1.55.chr09	4968640	4968825	186	4968708	3	4.90794	3.52479	1.38904	CaWRKY40b_peak_554
Pepper.v.1.55.chr09	9697039	9697464	426	9697235	31	44.22924	20.78898	39.03687	CaWRKY40b_peak_555
Pepper.v.1.55.chr09	10102731	10102916	186	10102848	4	5.87064	4.23815	1.99313	CaWRKY40b_peak_556
Pepper.v.1.55.chr09	10377685	10377892	208	10377801	8	7.36391	5.37604	3.16686	CaWRKY40b_peak_557
Pepper.v.1.55.chr09	16504921	16505371	451	16505118	26	48.2356	22.88603	42.97634	CaWRKY40b_peak_558
Pepper.v.1.55.chr09	20447237	20447552	316	20447384	24	47.0899	22.0509	41.84943	CaWRKY40b_peak_559
Pepper.v.1.55.chr09	20456064	20456315	252	20456192	7	9.2632	6.30101	4.8988	CaWRKY40b_peak_560
Pepper.v.1.55.chr09	21818874	21819059	186	21819036	5	9.82222	5.60882	5.41776	CaWRKY40b_peak_561
Pepper.v.1.55.chr09	30930160	30930371	212	30930266	5	8.721	5.42009	4.39217	CaWRKY40b_peak_562
Pepper.v.1.55.chr09	39484466	39484657	192	39484630	11	10.687	6.98066	6.25207	CaWRKY40b_peak_563
Pepper.v.1.55.chr09	40159812	40160029	218	40159935	4	7.34337	4.58766	3.14713	CaWRKY40b_peak_564
Pepper.v.1.55.chr09	41769091	41769412	322	41769225	8	11.48309	7.34875	7.01965	CaWRKY40b_peak_565
Pepper.v.1.55.chr09	48043801	48044072	272	48043940	7	13.01092	7.34026	8.48801	CaWRKY40b_peak_566
Pepper.v.1.55.chr09	63697461	63697722	262	63697594	14	27.84818	13.76299	22.95723	CaWRKY40b_peak_567
Pepper.v.1.55.chr09	65908429	65908616	188	65908533	6	11.82435	6.54362	7.33121	CaWRKY40b_peak_568
Pepper.v.1.55.chr09	74151560	74152159	600	74151899	41	87.75529	37.0103	81.919	CaWRKY40b_peak_569
Pepper.v.1.55.chr09	76531795	76531980	186	76531878	3	5.59675	3.67013	1.82835	CaWRKY40b_peak_570
Pepper.v.1.55.chr09	77151763	77151969	207	77151868	8	13.44466	7.93078	8.9078	CaWRKY40b_peak_571
Pepper.v.1.55.chr09	77195231	77195543	313	77195339	8	15.99542	8.41322	11.37282	CaWRKY40b_peak_572
Pepper.v.1.55.chr09	80512744	80512929	186	80512883	8	8.18371	5.8469	3.87223	CaWRKY40b_peak_573
Pepper.v.1.55.chr09	82002421	82002759	339	82002624	9	9.45411	6.49656	5.08538	CaWRKY40b_peak_574
Pepper.v.1.55.chr09	86874443	86874983	541	86874726	31	56.26357	26.12887	50.87811	CaWRKY40b_peak_575
Pepper.v.1.55.chr09	112599100	112599285	186	112599239	4	7.29474	4.57898	3.12721	CaWRKY40b_peak_576
Pepper.v.1.55.chr09	115765341	115765526	186	115765449	4	6.78012	4.47618	2.6597	CaWRKY40b_peak_577
Pepper.v.1.55.chr09	118104582	118104767	186	118104743	9	9.12416	6.31227	4.77721	CaWRKY40b_peak_578
Pepper.v.1.55.chr09	118583873	118584058	186	118583965	5	9.82222	5.60882	5.41776	CaWRKY40b_peak_579
Pepper.v.1.55.chr09	124329466	124329656	191	124329556	6	8.32648	5.71569	4.00763	CaWRKY40b_peak_580
Pepper.v.1.55.chr09	130764373	130764711	339	130764489	7	9.87935	6.53222	5.4617	CaWRKY40b_peak_581
Pepper.v.1.55.chr09	138713070	138713324	255	138713200	6	8.32648	5.71569	4.00763	CaWRKY40b_peak_582
Pepper.v.1.55.chr09	144830443	144831712	1270	144830644	5	9.1688	5.5052	4.80958	CaWRKY40b_peak_583a
Pepper.v.1.55.chr09	144830443	144831712	1270	144830941	9	18.15219	9.34803	13.47871	CaWRKY40b_peak_583b
Pepper.v.1.55.chr09	144830443	144831712	1270	144831141	11	22.58616	11.21763	17.80977	CaWRKY40b_peak_583c
Pepper.v.1.55.chr09	144830443	144831712	1270	144831512	8	15.99542	8.41322	11.37282	CaWRKY40b_peak_583d
Pepper.v.1.55.chr09	147347303	147347488	186	147347432	4	6.47914	4.40599	2.38256	CaWRKY40b_peak_584
Pepper.v.1.55.chr09	179500645	179500830	186	179500737	6	10.49108	6.3139	6.06408	CaWRKY40b_peak_585
Pepper.v.1.55.chr09	180728259	180728450	192	180728349	5	7.39599	5.08578	3.18729	CaWRKY40b_peak_586
Pepper.v.1.55.chr09	189698870	189699059	190	189698956	6	11.82435	6.54362	7.33121	CaWRKY40b_peak_587
Pepper.v.1.55.chr09	195213458	195213661	204	195213557	5	7.39599	5.08578	3.18729	CaWRKY40b_peak_588
Pepper.v.1.55.chr09	197455754	197455943	190	197455913	10	12.63119	8.0911	8.12344	CaWRKY40b_peak_589
Pepper.v.1.55.chr09	197544714	197545011	298	197544813	4	7.34337	4.58766	3.14713	CaWRKY40b_peak_590
Pepper.v.1.55.chr09	200561948	200562149	202	200562050	6	8.32648	5.71569	4.00763	CaWRKY40b_peak_591
Pepper.v.1.55.chr09	202511127	202511312	186	202511206	4	6.47914	4.40599	2.38256	CaWRKY40b_peak_592
Pepper.v.1.55.chr09	205796992	205797268	277	205797130	6	10.06239	6.22011	5.64252	CaWRKY40b_peak_593
Pepper.v.1.55.chr09	209326051	209326236	186	209326132	3	4.90794	3.52479	1.38904	CaWRKY40b_peak_594
Pepper.v.1.55.chr09	225531274	225531459	186	225531387	5	7.39599	5.08578	3.18729	CaWRKY40b_peak_595
Pepper.v.1.55.chr09	228314042	228314239	198	228314152	6	10.73125	6.36187	6.2938	CaWRKY40b_peak_596
Pepper.v.1.55.chr09	228349141	228349336	196	228349156	5	7.58043	5.14061	3.35828	CaWRKY40b_peak_597
Pepper.v.1.55.chr09	233672701	233672890	190	233672789	8	7.88833	5.68104	3.59699	CaWRKY40b_peak_598
Pepper.v.1.55.chr09	237052570	237052755	186	237052739	5	9.82222	5.60882	5.41776	CaWRKY40b_peak_599
Pepper.v.1.55.chr09	242151626	242151891	266	242151757	20	43.23499	19.51555	38.06789	CaWRKY40b_peak_600
Pepper.v.1.55.chr09	242295191	242295377	187	242295301	5	9.46069	5.5543	5.0916	CaWRKY40b_peak_601
Pepper.v.1.55.chr09	248757005	248757459	455	248757214	14	23.3693	12.71446	18.57398	CaWRKY40b_peak_602
Pepper.v.1.55.chr09	248758074	248758805	732	248758434	33	57.93732	26.77928	52.52829	CaWRKY40b_peak_603
Pepper.v.1.55.chr09	248759342	248760092	751	248759708	14	20.7645	11.81439	16.03283	CaWRKY40b_peak_604
Pepper.v.1.55.chr09	251636699	251636892	194	251636790	5	8.92986	5.46133	4.59379	CaWRKY40b_peak_605
Pepper.v.1.55.chr10	832588	833021	434	832806	69	53.35643	11.68944	48.02339	CaWRKY40b_peak_606
Pepper.v.1.55.chr10	833523	834623	1101	833944	250	237.75581	20.82093	230.66032	CaWRKY40b_peak_607a
Pepper.v.1.55.chr10	833523	834623	1101	834370	133	106.60319	13.91712	100.59371	CaWRKY40b_peak_607b
Pepper.v.1.55.chr10	836575	838256	1682	836803	96	61.65914	9.33374	56.19488	CaWRKY40b_peak_608a
Pepper.v.1.55.chr10	836575	838256	1682	837217	99	94.9204	18.30297	89.01531	CaWRKY40b_peak_608b
Pepper.v.1.55.chr10	836575	838256	1682	837734	120	113.85143	18.66521	107.76489	CaWRKY40b_peak_608c
Pepper.v.1.55.chr10	838315	838631	317	838460	23	20.91707	10.0287	16.1841	CaWRKY40b_peak_609
Pepper.v.1.55.chr10	838683	839016	334	838849	26	25.97672	12.01979	21.12872	CaWRKY40b_peak_610
Pepper.v.1.55.chr10	1153394	1153716	323	1153528	4	6.47914	4.40599	2.38256	CaWRKY40b_peak_611
Pepper.v.1.55.chr10	1164156	1164341	186	1164244	4	6.47914	4.40599	2.38256	CaWRKY40b_peak_612
Pepper.v.1.55.chr10	3610018	3610203	186	3610123	5	9.82222	5.60882	5.41776	CaWRKY40b_peak_613
Pepper.v.1.55.chr10	6646438	6646776	339	6646574	11	10.10904	6.63381	5.68852	CaWRKY40b_peak_614
Pepper.v.1.55.chr10	6846130	6846315	186	6846303	5	9.82222	5.60882	5.41776	CaWRKY40b_peak_615
Pepper.v.1.55.chr10	7399230	7399415	186	7399318	5	9.82222	5.60882	5.41776	CaWRKY40b_peak_616
Pepper.v.1.55.chr10	11058491	11060159	1669	11058690	14	21.93394	12.24791	17.17188	CaWRKY40b_peak_617a
Pepper.v.1.55.chr10	11058491	11060159	1669	11059364	25	46.05883	22.0384	40.84055	CaWRKY40b_peak_617b
Pepper.v.1.55.chr10	11058491	11060159	1669	11059886	24	37.87877	19.01751	32.81322	CaWRKY40b_peak_617c
Pepper.v.1.55.chr10	21143602	21143837	236	21143721	8	13.44466	7.93078	8.9078	CaWRKY40b_peak_618
Pepper.v.1.55.chr10	34074179	34074515	337	34074379	11	21.75273	11.09143	16.9957	CaWRKY40b_peak_619
Pepper.v.1.55.chr10	34075072	34076342	1271	34075626	22	42.48431	20.26754	37.32549	CaWRKY40b_peak_620a
Pepper.v.1.55.chr10	34075072	34076342	1271	34076017	44	95.29626	39.65389	89.38155	CaWRKY40b_peak_620b
Pepper.v.1.55.chr10	34076604	34076814	211	34076705	9	17.63806	9.27151	12.98254	CaWRKY40b_peak_621
Pepper.v.1.55.chr10	38695666	38695909	244	38695809	5	8.12895	5.28719	3.81926	CaWRKY40b_peak_622
Pepper.v.1.55.chr10	40921900	40922085	186	40921904	4	7.88685	4.67401	3.59576	CaWRKY40b_peak_623
Pepper.v.1.55.chr10	46032362	46032548	187	46032442	3	4.81909	3.50232	1.37801	CaWRKY40b_peak_624
Pepper.v.1.55.chr10	46215877	46216984	1108	46216195	30	49.61777	23.58171	44.33381	CaWRKY40b_peak_625a
Pepper.v.1.55.chr10	46215877	46216984	1108	46216344	28	45.64445	22.06031	40.43222	CaWRKY40b_peak_625b
Pepper.v.1.55.chr10	46215877	46216984	1108	46216645	39	60.36014	26.76772	54.91629	CaWRKY40b_peak_625c
Pepper.v.1.55.chr10	46219480	46219768	289	46219625	11	19.17734	10.57437	14.4791	CaWRKY40b_peak_626
Pepper.v.1.55.chr10	46333966	46334314	349	46334184	4	7.88685	4.67401	3.59576	CaWRKY40b_peak_627
Pepper.v.1.55.chr10	50222401	50223343	943	50222631	23	44.73486	21.14874	39.53434	CaWRKY40b_peak_628
Pepper.v.1.55.chr10	51209286	51209687	402	51209371	4	7.58612	4.62858	3.36305	CaWRKY40b_peak_629
Pepper.v.1.55.chr10	52394983	52395261	279	52395112	8	12.25048	7.60204	7.75278	CaWRKY40b_peak_630
Pepper.v.1.55.chr10	54365097	54365454	358	54365265	15	22.53827	12.60201	17.76812	CaWRKY40b_peak_631
Pepper.v.1.55.chr10	62264437	62264622	186	62264523	3	5.90077	3.72014	1.99313	CaWRKY40b_peak_632
Pepper.v.1.55.chr10	63144331	63144516	186	63144501	4	7.34337	4.58766	3.14713	CaWRKY40b_peak_633
Pepper.v.1.55.chr10	64544872	64545060	189	64545009	4	7.34337	4.58766	3.14713	CaWRKY40b_peak_634
Pepper.v.1.55.chr10	68882104	68882356	253	68882242	4	7.34337	4.58766	3.14713	CaWRKY40b_peak_635
Pepper.v.1.55.chr10	75017326	75017672	347	75017472	18	11.04233	5.69396	6.59767	CaWRKY40b_peak_636
Pepper.v.1.55.chr10	79136782	79136968	187	79136873	7	11.61951	7.04958	7.14661	CaWRKY40b_peak_637
Pepper.v.1.55.chr10	87030741	87031015	275	87030861	7	13.88435	7.47842	9.32851	CaWRKY40b_peak_638
Pepper.v.1.55.chr10	89480545	89480731	187	89480621	6	5.1563	4.18136	1.58854	CaWRKY40b_peak_639
Pepper.v.1.55.chr10	89618792	89619118	327	89618938	10	14.82294	8.9818	10.24754	CaWRKY40b_peak_640
Pepper.v.1.55.chr10	93744726	93744915	190	93744888	6	9.84535	6.16838	5.43234	CaWRKY40b_peak_641
Pepper.v.1.55.chr10	107003575	107003760	186	107003676	6	10.06239	6.22011	5.64252	CaWRKY40b_peak_642
Pepper.v.1.55.chr10	119072443	119072628	186	119072536	5	9.20559	5.51165	4.84486	CaWRKY40b_peak_643
Pepper.v.1.55.chr10	122099488	122099673	186	122099569	3	6.03037	3.73921	1.99313	CaWRKY40b_peak_644
Pepper.v.1.55.chr10	128572944	128573292	349	128573120	8	14.85408	8.22956	10.27586	CaWRKY40b_peak_645
Pepper.v.1.55.chr10	129155149	129155497	349	129155323	8	15.99542	8.41322	11.37282	CaWRKY40b_peak_646
Pepper.v.1.55.chr10	144596004	144596333	330	144596193	27	47.73353	22.86276	42.48154	CaWRKY40b_peak_647
Pepper.v.1.55.chr10	147692622	147692952	331	147692809	10	18.99595	10.06605	14.31103	CaWRKY40b_peak_648
Pepper.v.1.55.chr10	164320465	164320812	348	164320639	10	19.14666	10.09286	14.45437	CaWRKY40b_peak_649
Pepper.v.1.55.chr10	166810191	166810376	186	166810283	5	9.1688	5.5052	4.80958	CaWRKY40b_peak_650
Pepper.v.1.55.chr10	168530781	168531965	1185	168530893	23	7.06529	3.23172	2.92306	CaWRKY40b_peak_651a
Pepper.v.1.55.chr10	168530781	168531965	1185	168531458	55	25.07225	5.55675	20.24415	CaWRKY40b_peak_651b
Pepper.v.1.55.chr10	168530781	168531965	1185	168531787	39	15.40847	4.5124	10.81472	CaWRKY40b_peak_651c
Pepper.v.1.55.chr10	176892548	176892810	263	176892667	5	8.68122	5.41192	4.35319	CaWRKY40b_peak_652
Pepper.v.1.55.chr10	178551852	178552205	354	178552001	7	10.63732	6.78105	6.20325	CaWRKY40b_peak_653
Pepper.v.1.55.chr10	178892722	178893228	507	178893019	23	41.75507	20.34314	36.60926	CaWRKY40b_peak_654
Pepper.v.1.55.chr10	183700338	183700523	186	183700451	4	6.47914	4.40599	2.38256	CaWRKY40b_peak_655
Pepper.v.1.55.chr10	189027514	189027699	186	189027614	3	6.03037	3.73921	1.99313	CaWRKY40b_peak_656
Pepper.v.1.55.chr10	193699749	193699934	186	193699823	3	4.90794	3.52479	1.38904	CaWRKY40b_peak_657
Pepper.v.1.55.chr10	193826961	193827158	198	193827073	9	10.21058	6.89942	5.78748	CaWRKY40b_peak_658
Pepper.v.1.55.chr10	194071046	194071473	428	194071301	17	11.95966	6.43411	7.46523	CaWRKY40b_peak_659
Pepper.v.1.55.chr10	196574929	196575706	778	196575172	65	122.2121	48.54662	116.0323	CaWRKY40b_peak_660a
Pepper.v.1.55.chr10	196574929	196575706	778	196575599	6	9.84535	6.16838	5.43234	CaWRKY40b_peak_660b
Pepper.v.1.55.chr10	197523557	197523882	326	197523713	16	32.3757	15.59805	27.40372	CaWRKY40b_peak_661
Pepper.v.1.55.chr10	199524056	199524259	204	199524165	6	10.9926	6.41057	6.5485	CaWRKY40b_peak_662
Pepper.v.1.55.chr10	200181036	200181416	381	200181250	19	33.36665	16.95261	28.38305	CaWRKY40b_peak_663
Pepper.v.1.55.chr10	200487079	200487264	186	200487197	5	9.82222	5.60882	5.41776	CaWRKY40b_peak_664
Pepper.v.1.55.chr10	200987279	200987790	512	200987587	21	40.25222	19.38635	35.13915	CaWRKY40b_peak_665
Pepper.v.1.55.chr10	201907091	201907592	502	201907304	22	46.51571	21.10325	41.28934	CaWRKY40b_peak_666
Pepper.v.1.55.chr10	214191581	214191948	368	214191722	9	16.80689	9.13	12.17166	CaWRKY40b_peak_667
Pepper.v.1.55.chr10	215973985	215974173	189	215974154	6	11.82435	6.54362	7.33121	CaWRKY40b_peak_668
Pepper.v.1.55.chr10	216975611	216975938	328	216975739	6	8.98782	5.93341	4.64519	CaWRKY40b_peak_669
Pepper.v.1.55.chr10	218302904	218303092	189	218302996	7	10.63732	6.78105	6.20325	CaWRKY40b_peak_670
Pepper.v.1.55.chr10	221666479	221666948	470	221666805	28	16.90769	6.56789	12.27154	CaWRKY40b_peak_671
Pepper.v.1.55.chr10	222280052	222280280	229	222280168	5	8.12895	5.28719	3.81926	CaWRKY40b_peak_672
Pepper.v.1.55.chr10	223880732	223881169	438	223880914	25	38.3072	19.12442	33.2342	CaWRKY40b_peak_673
Pepper.v.1.55.chr10	230043914	230044274	361	230044093	6	8.98782	5.93341	4.64519	CaWRKY40b_peak_674
Pepper.v.1.55.chr10	231608229	231608503	275	231608366	4	6.49619	4.41018	2.39454	CaWRKY40b_peak_675
Pepper.v.1.55.chr11	865720	865983	264	865837	10	10.06476	6.75196	5.64459	CaWRKY40b_peak_676
Pepper.v.1.55.chr11	1210625	1211013	389	1210887	17	13.78657	7.52152	9.24415	CaWRKY40b_peak_677
Pepper.v.1.55.chr11	1212819	1213008	190	1212907	10	9.19065	6.23591	4.83114	CaWRKY40b_peak_678
Pepper.v.1.55.chr11	1401528	1401759	232	1401644	5	9.82222	5.60882	5.41776	CaWRKY40b_peak_679
Pepper.v.1.55.chr11	1433348	1433533	186	1433410	3	6.03037	3.73921	1.99313	CaWRKY40b_peak_680
Pepper.v.1.55.chr11	1436249	1436434	186	1436334	4	7.88685	4.67401	3.59576	CaWRKY40b_peak_681
Pepper.v.1.55.chr11	3080495	3080803	309	3080640	15	22.53827	12.60201	17.76812	CaWRKY40b_peak_682
Pepper.v.1.55.chr11	3797661	3797846	186	3797829	10	9.46247	6.39894	5.09302	CaWRKY40b_peak_683
Pepper.v.1.55.chr11	3797903	3798106	204	3797981	12	8.48223	5.43221	4.16217	CaWRKY40b_peak_684
Pepper.v.1.55.chr11	4860515	4860706	192	4860694	5	9.82222	5.60882	5.41776	CaWRKY40b_peak_685
Pepper.v.1.55.chr11	9530745	9531349	605	9530913	22	30.58895	15.86866	25.65514	CaWRKY40b_peak_686a
Pepper.v.1.55.chr11	9530745	9531349	605	9531181	18	31.91376	16.27861	26.95084	CaWRKY40b_peak_686b
Pepper.v.1.55.chr11	9531527	9531907	381	9531697	31	59.34577	27.12418	53.91423	CaWRKY40b_peak_687
Pepper.v.1.55.chr11	11852381	11852585	205	11852548	16	12.45735	6.97272	7.95218	CaWRKY40b_peak_688
Pepper.v.1.55.chr11	16812710	16813010	301	16812861	6	9.84535	6.16838	5.43234	CaWRKY40b_peak_689
Pepper.v.1.55.chr11	22012182	22012623	442	22012373	31	53.7487	25.20402	48.40642	CaWRKY40b_peak_690
Pepper.v.1.55.chr11	29912532	29912717	186	29912616	5	8.12895	5.28719	3.81926	CaWRKY40b_peak_691
Pepper.v.1.55.chr11	37862509	37862829	321	37862669	6	11.82435	6.54362	7.33121	CaWRKY40b_peak_692
Pepper.v.1.55.chr11	42408108	42408346	239	42408230	6	9.84535	6.16838	5.43234	CaWRKY40b_peak_693
Pepper.v.1.55.chr11	47705843	47706109	267	47705943	7	12.63362	7.27071	8.12397	CaWRKY40b_peak_694
Pepper.v.1.55.chr11	47709465	47710055	591	47709605	14	29.00133	13.95051	24.10119	CaWRKY40b_peak_695
Pepper.v.1.55.chr11	47994949	47995268	320	47995082	13	7.83995	4.84854	3.59576	CaWRKY40b_peak_696
Pepper.v.1.55.chr11	47995440	47995626	187	47995527	10	8.69489	5.93358	4.36641	CaWRKY40b_peak_697
Pepper.v.1.55.chr11	48064526	48064714	189	48064670	6	11.33996	6.47	6.88208	CaWRKY40b_peak_698
Pepper.v.1.55.chr11	56658624	56658962	339	56658823	14	23.3693	12.71446	18.57398	CaWRKY40b_peak_699
Pepper.v.1.55.chr11	77670352	77670537	186	77670465	4	6.47914	4.40599	2.38256	CaWRKY40b_peak_700
Pepper.v.1.55.chr11	82562071	82562289	219	82562174	5	9.1688	5.5052	4.80958	CaWRKY40b_peak_701
Pepper.v.1.55.chr11	105499358	105499543	186	105499524	5	9.627	5.58021	5.25026	CaWRKY40b_peak_702
Pepper.v.1.55.chr11	128419696	128420043	348	128419927	5	9.1688	5.5052	4.80958	CaWRKY40b_peak_703
Pepper.v.1.55.chr11	132317301	132317491	191	132317383	4	7.29474	4.57898	3.12721	CaWRKY40b_peak_704
Pepper.v.1.55.chr11	153846790	153847137	348	153847027	6	10.40022	6.29492	5.97474	CaWRKY40b_peak_705
Pepper.v.1.55.chr11	165224162	165224487	326	165224279	9	13.13239	8.16527	8.60502	CaWRKY40b_peak_706
Pepper.v.1.55.chr11	173396337	173396602	266	173396484	6	8.98782	5.93341	4.64519	CaWRKY40b_peak_707
Pepper.v.1.55.chr11	175305135	175305320	186	175305208	4	7.88685	4.67401	3.59576	CaWRKY40b_peak_708
Pepper.v.1.55.chr11	175305871	175306364	494	175306128	4	7.88685	4.67401	3.59576	CaWRKY40b_peak_709
Pepper.v.1.55.chr11	175306565	175307102	538	175306697	10	20.3503	10.28283	15.62387	CaWRKY40b_peak_710
Pepper.v.1.55.chr11	175307380	175308077	698	175307525	7	13.88435	7.47842	9.32851	CaWRKY40b_peak_711
Pepper.v.1.55.chr11	176154892	176155077	186	176154978	3	4.81909	3.50232	1.37801	CaWRKY40b_peak_712
Pepper.v.1.55.chr11	179720188	179720529	342	179720359	6	11.82435	6.54362	7.33121	CaWRKY40b_peak_713
Pepper.v.1.55.chr11	187056771	187057104	334	187056981	5	9.51493	5.56291	5.14411	CaWRKY40b_peak_714
Pepper.v.1.55.chr11	188410342	188410527	186	188410500	5	8.12895	5.28719	3.81926	CaWRKY40b_peak_715
Pepper.v.1.55.chr11	194236468	194236654	187	194236640	6	8.98782	5.93341	4.64519	CaWRKY40b_peak_716
Pepper.v.1.55.chr11	211336212	211336554	343	211336386	10	15.87108	9.32394	11.26319	CaWRKY40b_peak_717
Pepper.v.1.55.chr11	213567007	213567193	187	213567090	4	7.74841	4.65379	3.51377	CaWRKY40b_peak_718
Pepper.v.1.55.chr11	217718446	217718981	536	217718663	8	15.99542	8.41322	11.37282	CaWRKY40b_peak_719
Pepper.v.1.55.chr11	228878311	228878496	186	228878425	3	4.90794	3.52479	1.38904	CaWRKY40b_peak_720
Pepper.v.1.55.chr11	229819365	229819561	197	229819453	7	10.63732	6.78105	6.20325	CaWRKY40b_peak_721
Pepper.v.1.55.chr11	234636800	234637277	478	234637045	36	67.22453	30.21151	61.67345	CaWRKY40b_peak_722
Pepper.v.1.55.chr11	236202543	236202735	193	236202629	4	7.88685	4.67401	3.59576	CaWRKY40b_peak_723
Pepper.v.1.55.chr11	236950184	236950370	187	236950358	5	8.12895	5.28719	3.81926	CaWRKY40b_peak_724
Pepper.v.1.55.chr11	237079413	237079603	191	237079502	6	8.98782	5.93341	4.64519	CaWRKY40b_peak_725
Pepper.v.1.55.chr11	237602223	237602551	329	237602414	13	27.15953	13.08724	22.29092	CaWRKY40b_peak_726
Pepper.v.1.55.chr11	237604911	237605524	614	237605334	43	92.77277	38.77269	86.88883	CaWRKY40b_peak_727
Pepper.v.1.55.chr11	242146358	242146543	186	242146519	10	8.04787	5.53132	3.75244	CaWRKY40b_peak_728
Pepper.v.1.55.chr11	248237003	248237188	186	248237094	4	7.14471	4.55111	2.99329	CaWRKY40b_peak_729
Pepper.v.1.55.chr11	252598317	252598608	292	252598488	8	15.99542	8.41322	11.37282	CaWRKY40b_peak_730
Pepper.v.1.55.chr11	252600663	252601034	372	252600825	34	80.52082	32.71809	74.7826	CaWRKY40b_peak_731
Pepper.v.1.55.chr11	253974346	253974531	186	253974447	4	6.72015	4.46282	2.6085	CaWRKY40b_peak_732
Pepper.v.1.55.chr11	256163187	256163372	186	256163280	4	6.40532	4.38754	2.34429	CaWRKY40b_peak_733
Pepper.v.1.55.chr11	257143005	257143324	320	257143206	15	27.29968	14.09916	22.42374	CaWRKY40b_peak_734
Pepper.v.1.55.chr12	1745624	1745814	191	1745714	4	6.25825	4.34925	2.21019	CaWRKY40b_peak_735
Pepper.v.1.55.chr12	1861224	1861409	186	1861312	6	8.32648	5.71569	4.00763	CaWRKY40b_peak_736
Pepper.v.1.55.chr12	4076999	4077342	344	4077164	14	13.8268	8.29226	9.28357	CaWRKY40b_peak_737
Pepper.v.1.55.chr12	4219204	4219392	189	4219289	5	9.82222	5.60882	5.41776	CaWRKY40b_peak_738
Pepper.v.1.55.chr12	4894108	4894293	186	4894177	3	5.49707	3.652	1.82835	CaWRKY40b_peak_739
Pepper.v.1.55.chr12	8589334	8589519	186	8589413	3	5.72064	3.69144	1.91412	CaWRKY40b_peak_740
Pepper.v.1.55.chr12	9235569	9235859	291	9235679	8	11.48309	7.34875	7.01965	CaWRKY40b_peak_741
Pepper.v.1.55.chr12	20704456	20704793	338	20704673	7	12.63362	7.27071	8.12397	CaWRKY40b_peak_742
Pepper.v.1.55.chr12	22227605	22227790	186	22227679	3	5.72064	3.69144	1.91412	CaWRKY40b_peak_743
Pepper.v.1.55.chr12	22404413	22404694	282	22404539	7	13.01092	7.34026	8.48801	CaWRKY40b_peak_744
Pepper.v.1.55.chr12	23811767	23812055	289	23811905	18	37.00262	17.43312	31.95168	CaWRKY40b_peak_745
Pepper.v.1.55.chr12	24173834	24174345	512	24174026	53	102.21606	42.53179	96.24319	CaWRKY40b_peak_746
Pepper.v.1.55.chr12	24176340	24176677	338	24176530	12	19.55577	11.0192	14.84956	CaWRKY40b_peak_747
Pepper.v.1.55.chr12	24680080	24680408	329	24680244	6	11.06094	6.42273	6.60712	CaWRKY40b_peak_748
Pepper.v.1.55.chr12	30845586	30845935	350	30845786	14	25.2251	13.21796	20.39251	CaWRKY40b_peak_749
Pepper.v.1.55.chr12	36167715	36167900	186	36167803	4	6.47914	4.40599	2.38256	CaWRKY40b_peak_750
Pepper.v.1.55.chr12	50375696	50376033	338	50375872	13	27.11894	13.0815	22.25959	CaWRKY40b_peak_751
Pepper.v.1.55.chr12	61104690	61105015	326	61104863	17	36.65185	16.82645	31.60882	CaWRKY40b_peak_752
Pepper.v.1.55.chr12	61658568	61658753	186	61658657	4	7.88685	4.67401	3.59576	CaWRKY40b_peak_753
Pepper.v.1.55.chr12	68767169	68767354	186	68767228	4	5.87064	4.23815	1.99313	CaWRKY40b_peak_754
Pepper.v.1.55.chr12	70920464	70922270	1807	70920788	39	68.13577	30.42801	62.5724	CaWRKY40b_peak_755a
Pepper.v.1.55.chr12	70920464	70922270	1807	70921311	31	60.34901	27.4166	54.90556	CaWRKY40b_peak_755b
Pepper.v.1.55.chr12	70920464	70922270	1807	70921856	22	39.86519	19.56556	34.76039	CaWRKY40b_peak_755c
Pepper.v.1.55.chr12	74762909	74763094	186	74762945	4	6.36756	4.3779	2.31088	CaWRKY40b_peak_756
Pepper.v.1.55.chr12	82004438	82004775	338	82004650	10	11.60086	7.58936	7.13431	CaWRKY40b_peak_757
Pepper.v.1.55.chr12	86998795	86999015	221	86998894	6	7.78923	5.51338	3.54984	CaWRKY40b_peak_758
Pepper.v.1.55.chr12	104724750	104724992	243	104724869	5	8.12895	5.28719	3.81926	CaWRKY40b_peak_759
Pepper.v.1.55.chr12	119889341	119889681	341	119889488	5	5.6564	4.41333	1.87557	CaWRKY40b_peak_760
Pepper.v.1.55.chr12	122857601	122857786	186	122857686	4	5.87064	4.23815	1.99313	CaWRKY40b_peak_761
Pepper.v.1.55.chr12	123794928	123795121	194	123795015	9	11.70653	7.607	7.23131	CaWRKY40b_peak_762
Pepper.v.1.55.chr12	133603462	133603961	500	133603685	31	59.34577	27.12418	53.91423	CaWRKY40b_peak_763
Pepper.v.1.55.chr12	135085914	135086099	186	135085987	4	6.47914	4.40599	2.38256	CaWRKY40b_peak_764
Pepper.v.1.55.chr12	144771155	144771517	363	144771276	12	13.97109	8.69951	9.41222	CaWRKY40b_peak_765
Pepper.v.1.55.chr12	145859717	145859902	186	145859838	4	7.72445	4.65017	3.49077	CaWRKY40b_peak_766
Pepper.v.1.55.chr12	147896700	147896921	222	147896784	9	5.00348	3.75549	1.47285	CaWRKY40b_peak_767
Pepper.v.1.55.chr12	151687186	151687371	186	151687327	6	6.03146	4.68435	1.99341	CaWRKY40b_peak_768
Pepper.v.1.55.chr12	152776532	152776717	186	152776620	4	6.78012	4.47618	2.6597	CaWRKY40b_peak_769
Pepper.v.1.55.chr12	158086113	158086302	190	158086148	4	7.88685	4.67401	3.59576	CaWRKY40b_peak_770
Pepper.v.1.55.chr12	168976635	168976822	188	168976724	6	11.82435	6.54362	7.33121	CaWRKY40b_peak_771
Pepper.v.1.55.chr12	172005718	172005905	188	172005802	4	7.65416	4.63935	3.42777	CaWRKY40b_peak_772
Pepper.v.1.55.chr12	182312268	182312453	186	182312360	4	6.47914	4.40599	2.38256	CaWRKY40b_peak_773
Pepper.v.1.55.chr12	188004376	188004561	186	188004478	4	7.34337	4.58766	3.14713	CaWRKY40b_peak_774
Pepper.v.1.55.chr12	201039683	201039913	231	201039807	4	6.49619	4.41018	2.39454	CaWRKY40b_peak_775
Pepper.v.1.55.chr12	202192032	202192226	195	202192123	6	11.82435	6.54362	7.33121	CaWRKY40b_peak_776
Pepper.v.1.55.chr12	202216707	202216892	186	202216876	6	9.84535	6.16838	5.43234	CaWRKY40b_peak_777
Pepper.v.1.55.chr12	208216958	208217143	186	208217030	4	7.34337	4.58766	3.14713	CaWRKY40b_peak_778
Pepper.v.1.55.chr12	211596395	211596886	492	211596613	18	33.67542	16.74275	28.6827	CaWRKY40b_peak_779
Pepper.v.1.55.chr12	213940597	213940950	354	213940768	26	41.73002	20.53891	36.58891	CaWRKY40b_peak_780
Pepper.v.1.55.chr12	215479907	215480092	186	215480081	5	7.39599	5.08578	3.18729	CaWRKY40b_peak_781
Pepper.v.1.55.chr12	219068881	219069227	347	219069053	19	40.98622	18.61516	35.86563	CaWRKY40b_peak_782
Pepper.v.1.55.chr12	219071062	219071311	250	219071197	5	9.54249	5.56722	5.1697	CaWRKY40b_peak_783
Pepper.v.1.55.chr12	225860807	225860992	186	225860924	5	9.82222	5.60882	5.41776	CaWRKY40b_peak_784
Pepper.v.1.55.chr12	226326001	226326246	246	226326117	10	13.25125	8.3677	8.72115	CaWRKY40b_peak_785
Pepper.v.1.55.chr12	226333252	226333474	223	226333355	7	8.74492	6.0856	4.41377	CaWRKY40b_peak_786
Pepper.v.1.55.chr12	226334454	226334639	186	226334609	6	9.51763	6.08453	5.14523	CaWRKY40b_peak_787
Pepper.v.1.55.chr12	226564174	226564359	186	226564262	4	6.47914	4.40599	2.38256	CaWRKY40b_peak_788
Pepper.v.1.55.chr12	232046078	232046597	520	232046202	7	9.87935	6.53222	5.4617	CaWRKY40b_peak_789
Pepper.v.1.55.chr12	232052006	232052386	381	232052197	18	27.82637	14.89215	22.94139	CaWRKY40b_peak_790
Pepper.v.1.55.chr12	233336704	233336902	199	233336726	5	8.54673	5.38351	4.22299	CaWRKY40b_peak_791
Pepper.v.1.55.chr12	233825927	233826123	197	233826018	5	8.05541	5.26891	3.75995	CaWRKY40b_peak_792
Pepper.v.1.55.chr12	233861383	233861568	186	233861537	4	6.60516	4.43635	2.50248	CaWRKY40b_peak_793
Pepper.v.1.55.chr12	234503908	234504093	186	234504057	3	5.31324	3.61612	1.71403	CaWRKY40b_peak_794
Pepper.v.1.55.chr12	235079979	235080164	186	235080054	3	6.03037	3.73921	1.99313	CaWRKY40b_peak_795
