# Supplementary material for: CaWRKY40b in Pepper Acts as a Negative Regulator in Response to Ralstonia solanacearum by Directly Modulating Defense Genes Including CaWRKY40
Source: Int J Mol Sci. 2018 May 8;19(5):1403. doi: 10.3390/ijms19051403 (PMC5983674; doi:10.3390/ijms19051403)
Supplement: Supplementary file 1 [file ijms-19-01403-s001.zip › Table S2.xlsx]

## Sheet: Table S1
Table S2 primers used in this study
Gene	Forward primers (5'→3')	Reverse primers (5'→3')
Primers used for the construction of overexpression vectors
CaWRKY40b	GGGGACAAGTTTGTACAAAAAAGCAGGCTTCATGGAATTCACCAGTTTAGT	GGGGACCACTTTGTACAAGAAAGCTGGGTC TTATTTGTCTGTATGATTATTTTG
CaWRKY40b-SRDX	GGGGACAAGTTTGTACAAAAAAGCAGGCTTCATGGAATTCACCAGTTTAGT	GGGGACCACTTTGTACAAGAAAGCTGGGTCTCACTTACTTGGTCCATGACTATGT
Primers used for construction of subcellular localization vectors
ΔTAA-CaWRKY40b	GGGGACAAGTTTGTACAAAAAAGCAGGCTTCATGGAATTCACCAGTTTAGT	GGGGACCACTTTGTACAAGAAAGCTGGGTC TTTGTCTGTATGATTATTTTG
Primers used in the construction of VIGS vectors
CaWRKY40b-VIGS-1	GGGGACAAGTTTGTACAAAAAAGCAGGCTTC GTTAACAGTTATGTGCCAGA	GGGGACCACTTTGTACAAGAAAGCTGGGTC GAGAAGTATCAGATGCTTCG
CaWRKY40b-VIGS-2	GGGGACAAGTTTGTACAAAAAAGCAGGCTTC GGAGAACACAACCATTCCAA	GGGGACCACTTTGTACAAGAAAGCTGGGTC GCTGATGATGATCATGTCCT
Primers used for qRT-PCR analyses in pepper plants
CaWRKY40b-RT-1	GTTAACAGTTATGTGCCAGA	GAGAAGTATCAGATGCTTCG
CaWRKY40b-RT-2	GGAGAACACAACCATTCCAA	GCTGATGATGATCATGTCCT
CaJAR1	ACAACGACGTAAGTATATGC	CCACAAGAAGTAATTGAGGA
CaHSC70-1	GTTGGTTGTCGGAGTAGG	TGTTGTTCTTGTAGGTGGAT
CaEIN3	ATGATTGTCTCTGGTGGAT	TGATAGCAGTGAGTATGATG
CaCNGIC	GATGGTATGACTCTGGTGAA	CTGCTCTTCTTGCCTTGA
CaRLK1	AAGATGTGACTCTACGATGG	CGCTATGCTATACTGGCTAT
CaFLS	GCACTCCATCTTACTTAGC	GCCAACAAGTCTTACAGG
CaCDPK13	ACATCCTCCACATCAACTG	CAACTACTCTGCCAACGAT
CaWRKY40	AACTTGGATGTTGTGCCTGGA	CTGTAACCTTGGCTTTTATGTGC
CaActin	AGGGATGGGTCAAAAGGATGC	GAGACAACACCGCCTGAATAGC
16S rRNA	AGAGTTTGATCTGGCTCAG	ACGGATACCTTGTTACGACTT
Primers used for ChIP-qRT-PCR analyses in pepper plants
CaWRKY40b-Wbox	TAGTTTCCTAGTTTCGTTGG	GCCTTTCTTTTCTCTTGTCG
CaJAR1-Wbox	CTAAGGTTGTCCAAGAACTG	TGTACTAAGTATGAACAAAG
CaHSC70-1-Wbox	CGTGGGTGTTGTGGTTCTAG	CTCGTTCAAATTATTCCCTC
CaEIN3-Wbox	GCAGGAGGGAAGGTTATCA	TTGGGAGATAGGACAATATG
CaCNGIC-Wbox	GATTGATGGATGTCTCTTCG	CTCTTTAAGATAAAGAACAC
CaRLK1-Wbox	GGATGTCTCTTCGTTGTTAT	ATGATTACCATGAAATTCTA
CaFLS-Wbox	CACCAGTTCTCAGCAGAATC	AATCATAGCCTGAATGCAGG
CaCDPK13-Wbox	GTTTGAATGTCTATCGATGC	CTCAATTTAAGATGTTTGGT
